# Supplementary material for: Genetic Variation in the Plasmodium falciparum Circumsporozoite Protein in India and Its Relevance to RTS,S Malaria Vaccine
Source: PLoS One. 2012 Aug 17;7(8):e43430. doi: 10.1371/journal.pone.0043430 (PMC3422267; doi:10.1371/journal.pone.0043430)
Supplement: Table S1 — The available accession numbers, country origin and references of the isolates analyzed in this study. (XLS) [file pone.0043430.s004.xls]

## Sheet: Table S1
	Table S1: The available accession numbers, country origin and references of the isolates analyzed in this study
	Number	Accession number	Country	References
	1	AB121015.1	7G8 (Brazil)	Tanabe,K., Sakihama,N., Hattori,T., Ranford-Cartwright,L., Goldman,I., Escalante,A.A. and Lal,A.A. Genetic distance in housekeeping genes between Plasmodium falciparum and Plasmodium reichenowi and within P. falciparum. J. Mol. Evol. 59 (5), 687-694 (2004)
	2	AB121017.1	Dd2 (Indochina)	Tanabe,K., Sakihama,N., Hattori,T., Ranford-Cartwright,L., Goldman,I., Escalante,A.A. and Lal,A.A. Genetic distance in housekeeping genes between Plasmodium falciparum and Plasmodium reichenowi and within P. falciparum. J. Mol. Evol. 59 (5), 687-694 (2004)
	3	AB121018.1	HB3 (Honduras)	Tanabe,K., Sakihama,N., Hattori,T., Ranford-Cartwright,L., Goldman,I., Escalante,A.A. and Lal,A.A. Genetic distance in housekeeping genes between Plasmodium falciparum and Plasmodium reichenowi and within P. falciparum. J. Mol. Evol. 59 (5), 687-694 (2004)
	4	AB121020.1	MAD20 (PNG)	Tanabe,K., Sakihama,N., Hattori,T., Ranford-Cartwright,L., Goldman,I., Escalante,A.A. and Lal,A.A. Genetic distance in housekeeping genes between Plasmodium falciparum and Plasmodium reichenowi and within P. falciparum. J. Mol. Evol. 59 (5), 687-694 (2004)
	5	AB121021.1	RO-33 (Ghana)	Tanabe,K., Sakihama,N., Hattori,T., Ranford-Cartwright,L., Goldman,I., Escalante,A.A. and Lal,A.A. Genetic distance in housekeeping genes between Plasmodium falciparum and Plasmodium reichenowi and within P. falciparum. J. Mol. Evol. 59 (5), 687-694 (2004)
	6	AJ269946.1	K1 (Thailand)	de Stricker,K., Vuust,J., Jepsen,S., Oeuvray,C. and Theisen,M. Sequence variation in the non-repeat region of the Plasmodium falciparum glutamate rich protein (GLURP) from Brazil, Senegalese and Burmese field isolates and from laboratory strains. (Unpublished)
	7	M15505.1	Wellcome (West African)	Lockyer MJ, Schwarz RT. Strain variation in the circumsporozoite protein gene of Plasmodium falciparum. Mol Biochem Parasitol. 2;22(1):101-8 (1987).
	8	M22982.1	NF54 (Netherlands)	Caspers P, Gentz R, Matile H, Pink JR, Sinigaglia FThe circumsporozoite protein gene from NF54, a Plasmodium falciparum isolate used in malaria vaccine trials. Mol Biochem Parasitol. 35(2):185-9. (1989)
	1	AF540441.1	India	Escalante AA, Grebert HM, Isea R, Goldman IF, Basco L, Magris M, Biswas S, Kariuki S and Lal AA. A study of genetic diversity in the gene encoding the circumsporozoite protein (CSP) of Plasmodium falciparum from different transmission areas--XVI. Asembo Bay Cohort Project. Mol Biochem Parasitol125(1-2):83-90 (2002).
	2	AF540442.1	India	Escalante AA, Grebert HM, Isea R, Goldman IF, Basco L, Magris M, Biswas S, Kariuki S and Lal AA. A study of genetic diversity in the gene encoding the circumsporozoite protein (CSP) of Plasmodium falciparum from different transmission areas--XVI. Asembo Bay Cohort Project. Mol Biochem Parasitol125(1-2):83-90 (2002).
	3	AF540472.1	India	Escalante AA, Grebert HM, Isea R, Goldman IF, Basco L, Magris M, Biswas S, Kariuki S and Lal AA. A study of genetic diversity in the gene encoding the circumsporozoite protein (CSP) of Plasmodium falciparum from different transmission areas--XVI. Asembo Bay Cohort Project. Mol Biochem Parasitol125(1-2):83-90 (2002).
	4	AF540481.1	India	Escalante AA, Grebert HM, Isea R, Goldman IF, Basco L, Magris M, Biswas S, Kariuki S and Lal AA. A study of genetic diversity in the gene encoding the circumsporozoite protein (CSP) of Plasmodium falciparum from different transmission areas--XVI. Asembo Bay Cohort Project. Mol Biochem Parasitol125(1-2):83-90 (2002).
	5	AF540482.1	India	Escalante AA, Grebert HM, Isea R, Goldman IF, Basco L, Magris M, Biswas S, Kariuki S and Lal AA. A study of genetic diversity in the gene encoding the circumsporozoite protein (CSP) of Plasmodium falciparum from different transmission areas--XVI. Asembo Bay Cohort Project. Mol Biochem Parasitol125(1-2):83-90 (2002).
	6	AF540483.1	India	Escalante AA, Grebert HM, Isea R, Goldman IF, Basco L, Magris M, Biswas S, Kariuki S and Lal AA. A study of genetic diversity in the gene encoding the circumsporozoite protein (CSP) of Plasmodium falciparum from different transmission areas--XVI. Asembo Bay Cohort Project. Mol Biochem Parasitol125(1-2):83-90 (2002).
	7	AF540484.1	India	Escalante AA, Grebert HM, Isea R, Goldman IF, Basco L, Magris M, Biswas S, Kariuki S and Lal AA. A study of genetic diversity in the gene encoding the circumsporozoite protein (CSP) of Plasmodium falciparum from different transmission areas--XVI. Asembo Bay Cohort Project. Mol Biochem Parasitol125(1-2):83-90 (2002).
	8	AF540485.1	India	Escalante AA, Grebert HM, Isea R, Goldman IF, Basco L, Magris M, Biswas S, Kariuki S and Lal AA. A study of genetic diversity in the gene encoding the circumsporozoite protein (CSP) of Plasmodium falciparum from different transmission areas--XVI. Asembo Bay Cohort Project. Mol Biochem Parasitol125(1-2):83-90 (2002).
	9	AF540486.1	India	Escalante AA, Grebert HM, Isea R, Goldman IF, Basco L, Magris M, Biswas S, Kariuki S and Lal AA. A study of genetic diversity in the gene encoding the circumsporozoite protein (CSP) of Plasmodium falciparum from different transmission areas--XVI. Asembo Bay Cohort Project. Mol Biochem Parasitol125(1-2):83-90 (2002).
	10	AF540487.1	India	Escalante AA, Grebert HM, Isea R, Goldman IF, Basco L, Magris M, Biswas S, Kariuki S and Lal AA. A study of genetic diversity in the gene encoding the circumsporozoite protein (CSP) of Plasmodium falciparum from different transmission areas--XVI. Asembo Bay Cohort Project. Mol Biochem Parasitol125(1-2):83-90 (2002).
	11	AF540488.1	India	Escalante AA, Grebert HM, Isea R, Goldman IF, Basco L, Magris M, Biswas S, Kariuki S and Lal AA. A study of genetic diversity in the gene encoding the circumsporozoite protein (CSP) of Plasmodium falciparum from different transmission areas--XVI. Asembo Bay Cohort Project. Mol Biochem Parasitol125(1-2):83-90 (2002).
	12	AJ269943.1	India	de Stricker,K., Vuust,J., Jepsen,S., Oeuvray,C. and Theisen,M. Sequence variation in the non-repeat region of the Plasmodium falciparum glutamate rich protein (GLURP) from Brazil, Senegalese and Burmese field isolates and from laboratory strains. (Unpublished)
	1	DQ521663.1	Iran	Zakeri S, Avazalipoor M, Mehrizi AA, Djadid ND, Snounou G. Restricted T-cell epitope diversity in the circumsporozoite protein from Plasmodium falciparum populations prevalent in Iran. .Am J Trop Med Hyg. ;76(6):1046-51 (2007)
	2	DQ521664.1	Iran	Zakeri S, Avazalipoor M, Mehrizi AA, Djadid ND, Snounou G. Restricted T-cell epitope diversity in the circumsporozoite protein from Plasmodium falciparum populations prevalent in Iran. .Am J Trop Med Hyg. ;76(6):1046-51 (2007)
	3	DQ521665.1	Iran	Zakeri S, Avazalipoor M, Mehrizi AA, Djadid ND, Snounou G. Restricted T-cell epitope diversity in the circumsporozoite protein from Plasmodium falciparum populations prevalent in Iran. .Am J Trop Med Hyg. ;76(6):1046-51 (2007)
	4	DQ521666.1	Iran	Zakeri S, Avazalipoor M, Mehrizi AA, Djadid ND, Snounou G. Restricted T-cell epitope diversity in the circumsporozoite protein from Plasmodium falciparum populations prevalent in Iran. .Am J Trop Med Hyg. ;76(6):1046-51 (2007)
	5	DQ521667.1	Iran	Zakeri S, Avazalipoor M, Mehrizi AA, Djadid ND, Snounou G. Restricted T-cell epitope diversity in the circumsporozoite protein from Plasmodium falciparum populations prevalent in Iran. .Am J Trop Med Hyg. ;76(6):1046-51 (2007)
	6	DQ521668.1	Iran	Zakeri S, Avazalipoor M, Mehrizi AA, Djadid ND, Snounou G. Restricted T-cell epitope diversity in the circumsporozoite protein from Plasmodium falciparum populations prevalent in Iran. .Am J Trop Med Hyg. ;76(6):1046-51 (2007)
	7	DQ521669.1	Iran	Zakeri S, Avazalipoor M, Mehrizi AA, Djadid ND, Snounou G. Restricted T-cell epitope diversity in the circumsporozoite protein from Plasmodium falciparum populations prevalent in Iran. .Am J Trop Med Hyg. ;76(6):1046-51 (2007)
	8	DQ521670.1	Iran	Zakeri S, Avazalipoor M, Mehrizi AA, Djadid ND, Snounou G. Restricted T-cell epitope diversity in the circumsporozoite protein from Plasmodium falciparum populations prevalent in Iran. .Am J Trop Med Hyg. ;76(6):1046-51 (2007)
	9	DQ521671.1	Iran	Zakeri S, Avazalipoor M, Mehrizi AA, Djadid ND, Snounou G. Restricted T-cell epitope diversity in the circumsporozoite protein from Plasmodium falciparum populations prevalent in Iran. .Am J Trop Med Hyg. ;76(6):1046-51 (2007)
	10	DQ521672.1	Iran	Zakeri S, Avazalipoor M, Mehrizi AA, Djadid ND, Snounou G. Restricted T-cell epitope diversity in the circumsporozoite protein from Plasmodium falciparum populations prevalent in Iran. .Am J Trop Med Hyg. ;76(6):1046-51 (2007)
	11	DQ521673.1	Iran	Zakeri S, Avazalipoor M, Mehrizi AA, Djadid ND, Snounou G. Restricted T-cell epitope diversity in the circumsporozoite protein from Plasmodium falciparum populations prevalent in Iran. .Am J Trop Med Hyg. ;76(6):1046-51 (2007)
	12	DQ521674.1	Iran	Zakeri S, Avazalipoor M, Mehrizi AA, Djadid ND, Snounou G. Restricted T-cell epitope diversity in the circumsporozoite protein from Plasmodium falciparum populations prevalent in Iran. .Am J Trop Med Hyg. ;76(6):1046-51 (2007)
	13	DQ521675.1	Iran	Zakeri S, Avazalipoor M, Mehrizi AA, Djadid ND, Snounou G. Restricted T-cell epitope diversity in the circumsporozoite protein from Plasmodium falciparum populations prevalent in Iran. .Am J Trop Med Hyg. ;76(6):1046-51 (2007)
	14	DQ521676.1	Iran	Zakeri S, Avazalipoor M, Mehrizi AA, Djadid ND, Snounou G. Restricted T-cell epitope diversity in the circumsporozoite protein from Plasmodium falciparum populations prevalent in Iran. .Am J Trop Med Hyg. ;76(6):1046-51 (2007)
	15	DQ521677.1	Iran	Zakeri S, Avazalipoor M, Mehrizi AA, Djadid ND, Snounou G. Restricted T-cell epitope diversity in the circumsporozoite protein from Plasmodium falciparum populations prevalent in Iran. .Am J Trop Med Hyg. ;76(6):1046-51 (2007)
	16	DQ521678.1	Iran	Zakeri S, Avazalipoor M, Mehrizi AA, Djadid ND, Snounou G. Restricted T-cell epitope diversity in the circumsporozoite protein from Plasmodium falciparum populations prevalent in Iran. .Am J Trop Med Hyg. ;76(6):1046-51 (2007)
	17	DQ521679.1	Iran	Zakeri S, Avazalipoor M, Mehrizi AA, Djadid ND, Snounou G. Restricted T-cell epitope diversity in the circumsporozoite protein from Plasmodium falciparum populations prevalent in Iran. .Am J Trop Med Hyg. ;76(6):1046-51 (2007)
	18	DQ521680.1	Iran	Zakeri S, Avazalipoor M, Mehrizi AA, Djadid ND, Snounou G. Restricted T-cell epitope diversity in the circumsporozoite protein from Plasmodium falciparum populations prevalent in Iran. .Am J Trop Med Hyg. ;76(6):1046-51 (2007)
	19	DQ521681.1	Iran	Zakeri S, Avazalipoor M, Mehrizi AA, Djadid ND, Snounou G. Restricted T-cell epitope diversity in the circumsporozoite protein from Plasmodium falciparum populations prevalent in Iran. .Am J Trop Med Hyg. ;76(6):1046-51 (2007)
	20	DQ521682.1	Iran	Zakeri S, Avazalipoor M, Mehrizi AA, Djadid ND, Snounou G. Restricted T-cell epitope diversity in the circumsporozoite protein from Plasmodium falciparum populations prevalent in Iran. .Am J Trop Med Hyg. ;76(6):1046-51 (2007)
	21	DQ521683.1	Iran	Zakeri S, Avazalipoor M, Mehrizi AA, Djadid ND, Snounou G. Restricted T-cell epitope diversity in the circumsporozoite protein from Plasmodium falciparum populations prevalent in Iran. .Am J Trop Med Hyg. ;76(6):1046-51 (2007)
	22	DQ521684.1	Iran	Zakeri S, Avazalipoor M, Mehrizi AA, Djadid ND, Snounou G. Restricted T-cell epitope diversity in the circumsporozoite protein from Plasmodium falciparum populations prevalent in Iran. .Am J Trop Med Hyg. ;76(6):1046-51 (2007)
	23	DQ521685.1	Iran	Zakeri S, Avazalipoor M, Mehrizi AA, Djadid ND, Snounou G. Restricted T-cell epitope diversity in the circumsporozoite protein from Plasmodium falciparum populations prevalent in Iran. .Am J Trop Med Hyg. ;76(6):1046-51 (2007)
	24	DQ521686.1	Iran	Zakeri S, Avazalipoor M, Mehrizi AA, Djadid ND, Snounou G. Restricted T-cell epitope diversity in the circumsporozoite protein from Plasmodium falciparum populations prevalent in Iran. .Am J Trop Med Hyg. ;76(6):1046-51 (2007)
	25	DQ521687.1	Iran	Zakeri S, Avazalipoor M, Mehrizi AA, Djadid ND, Snounou G. Restricted T-cell epitope diversity in the circumsporozoite protein from Plasmodium falciparum populations prevalent in Iran. .Am J Trop Med Hyg. ;76(6):1046-51 (2007)
	26	DQ521688.1	Iran	Zakeri S, Avazalipoor M, Mehrizi AA, Djadid ND, Snounou G. Restricted T-cell epitope diversity in the circumsporozoite protein from Plasmodium falciparum populations prevalent in Iran. .Am J Trop Med Hyg. ;76(6):1046-51 (2007)
	27	DQ521689.1	Iran	Zakeri S, Avazalipoor M, Mehrizi AA, Djadid ND, Snounou G. Restricted T-cell epitope diversity in the circumsporozoite protein from Plasmodium falciparum populations prevalent in Iran. .Am J Trop Med Hyg. ;76(6):1046-51 (2007)
	28	DQ521690.1	Iran	Zakeri S, Avazalipoor M, Mehrizi AA, Djadid ND, Snounou G. Restricted T-cell epitope diversity in the circumsporozoite protein from Plasmodium falciparum populations prevalent in Iran. .Am J Trop Med Hyg. ;76(6):1046-51 (2007)
	29	DQ521691.1	Iran	Zakeri S, Avazalipoor M, Mehrizi AA, Djadid ND, Snounou G. Restricted T-cell epitope diversity in the circumsporozoite protein from Plasmodium falciparum populations prevalent in Iran. .Am J Trop Med Hyg. ;76(6):1046-51 (2007)
	30	DQ521692.1	Iran	Zakeri S, Avazalipoor M, Mehrizi AA, Djadid ND, Snounou G. Restricted T-cell epitope diversity in the circumsporozoite protein from Plasmodium falciparum populations prevalent in Iran. .Am J Trop Med Hyg. ;76(6):1046-51 (2007)
	31	DQ521693.1	Iran	Zakeri S, Avazalipoor M, Mehrizi AA, Djadid ND, Snounou G. Restricted T-cell epitope diversity in the circumsporozoite protein from Plasmodium falciparum populations prevalent in Iran. .Am J Trop Med Hyg. ;76(6):1046-51 (2007)
	32	DQ521694.1	Iran	Zakeri S, Avazalipoor M, Mehrizi AA, Djadid ND, Snounou G. Restricted T-cell epitope diversity in the circumsporozoite protein from Plasmodium falciparum populations prevalent in Iran. .Am J Trop Med Hyg. ;76(6):1046-51 (2007)
	33	DQ521695.1	Iran	Zakeri S, Avazalipoor M, Mehrizi AA, Djadid ND, Snounou G. Restricted T-cell epitope diversity in the circumsporozoite protein from Plasmodium falciparum populations prevalent in Iran. .Am J Trop Med Hyg. ;76(6):1046-51 (2007)
	34	DQ521696.1	Iran	Zakeri S, Avazalipoor M, Mehrizi AA, Djadid ND, Snounou G. Restricted T-cell epitope diversity in the circumsporozoite protein from Plasmodium falciparum populations prevalent in Iran. .Am J Trop Med Hyg. ;76(6):1046-51 (2007)
	35	DQ521697.1	Iran	Zakeri S, Avazalipoor M, Mehrizi AA, Djadid ND, Snounou G. Restricted T-cell epitope diversity in the circumsporozoite protein from Plasmodium falciparum populations prevalent in Iran. .Am J Trop Med Hyg. ;76(6):1046-51 (2007)
	36	DQ521698.1	Iran	Zakeri S, Avazalipoor M, Mehrizi AA, Djadid ND, Snounou G. Restricted T-cell epitope diversity in the circumsporozoite protein from Plasmodium falciparum populations prevalent in Iran. .Am J Trop Med Hyg. ;76(6):1046-51 (2007)
	37	DQ521699.1	Iran	Zakeri S, Avazalipoor M, Mehrizi AA, Djadid ND, Snounou G. Restricted T-cell epitope diversity in the circumsporozoite protein from Plasmodium falciparum populations prevalent in Iran. .Am J Trop Med Hyg. ;76(6):1046-51 (2007)
	38	DQ521700.1	Iran	Zakeri S, Avazalipoor M, Mehrizi AA, Djadid ND, Snounou G. Restricted T-cell epitope diversity in the circumsporozoite protein from Plasmodium falciparum populations prevalent in Iran. .Am J Trop Med Hyg. ;76(6):1046-51 (2007)
	39	DQ521701.1	Iran	Zakeri S, Avazalipoor M, Mehrizi AA, Djadid ND, Snounou G. Restricted T-cell epitope diversity in the circumsporozoite protein from Plasmodium falciparum populations prevalent in Iran. .Am J Trop Med Hyg. ;76(6):1046-51 (2007)
	40	DQ521702.1	Iran	Zakeri S, Avazalipoor M, Mehrizi AA, Djadid ND, Snounou G. Restricted T-cell epitope diversity in the circumsporozoite protein from Plasmodium falciparum populations prevalent in Iran. .Am J Trop Med Hyg. ;76(6):1046-51 (2007)
	41	DQ521703.1	Iran	Zakeri S, Avazalipoor M, Mehrizi AA, Djadid ND, Snounou G. Restricted T-cell epitope diversity in the circumsporozoite protein from Plasmodium falciparum populations prevalent in Iran. .Am J Trop Med Hyg. ;76(6):1046-51 (2007)
	42	DQ521704.1	Iran	Zakeri S, Avazalipoor M, Mehrizi AA, Djadid ND, Snounou G. Restricted T-cell epitope diversity in the circumsporozoite protein from Plasmodium falciparum populations prevalent in Iran. .Am J Trop Med Hyg. ;76(6):1046-51 (2007)
	43	DQ521705.1	Iran	Zakeri S, Avazalipoor M, Mehrizi AA, Djadid ND, Snounou G. Restricted T-cell epitope diversity in the circumsporozoite protein from Plasmodium falciparum populations prevalent in Iran. .Am J Trop Med Hyg. ;76(6):1046-51 (2007)
	44	DQ521706.1	Iran	Zakeri S, Avazalipoor M, Mehrizi AA, Djadid ND, Snounou G. Restricted T-cell epitope diversity in the circumsporozoite protein from Plasmodium falciparum populations prevalent in Iran. .Am J Trop Med Hyg. ;76(6):1046-51 (2007)
	45	DQ521707.1	Iran	Zakeri S, Avazalipoor M, Mehrizi AA, Djadid ND, Snounou G. Restricted T-cell epitope diversity in the circumsporozoite protein from Plasmodium falciparum populations prevalent in Iran. .Am J Trop Med Hyg. ;76(6):1046-51 (2007)
	46	DQ521708.1	Iran	Zakeri S, Avazalipoor M, Mehrizi AA, Djadid ND, Snounou G. Restricted T-cell epitope diversity in the circumsporozoite protein from Plasmodium falciparum populations prevalent in Iran. .Am J Trop Med Hyg. ;76(6):1046-51 (2007)
	47	DQ521709.1	Iran	Zakeri S, Avazalipoor M, Mehrizi AA, Djadid ND, Snounou G. Restricted T-cell epitope diversity in the circumsporozoite protein from Plasmodium falciparum populations prevalent in Iran. .Am J Trop Med Hyg. ;76(6):1046-51 (2007)
	48	DQ521710.1	Iran	Zakeri S, Avazalipoor M, Mehrizi AA, Djadid ND, Snounou G. Restricted T-cell epitope diversity in the circumsporozoite protein from Plasmodium falciparum populations prevalent in Iran. .Am J Trop Med Hyg. ;76(6):1046-51 (2007)
	49	DQ521711.1	Iran	Zakeri S, Avazalipoor M, Mehrizi AA, Djadid ND, Snounou G. Restricted T-cell epitope diversity in the circumsporozoite protein from Plasmodium falciparum populations prevalent in Iran. .Am J Trop Med Hyg. ;76(6):1046-51 (2007)
	50	DQ521712.1	Iran	Zakeri S, Avazalipoor M, Mehrizi AA, Djadid ND, Snounou G. Restricted T-cell epitope diversity in the circumsporozoite protein from Plasmodium falciparum populations prevalent in Iran. .Am J Trop Med Hyg. ;76(6):1046-51 (2007)
	51	DQ521713.1	Iran	Zakeri S, Avazalipoor M, Mehrizi AA, Djadid ND, Snounou G. Restricted T-cell epitope diversity in the circumsporozoite protein from Plasmodium falciparum populations prevalent in Iran. .Am J Trop Med Hyg. ;76(6):1046-51 (2007)
	52	DQ521714.1	Iran	Zakeri S, Avazalipoor M, Mehrizi AA, Djadid ND, Snounou G. Restricted T-cell epitope diversity in the circumsporozoite protein from Plasmodium falciparum populations prevalent in Iran. .Am J Trop Med Hyg. ;76(6):1046-51 (2007)
	53	DQ521715.1	Iran	Zakeri S, Avazalipoor M, Mehrizi AA, Djadid ND, Snounou G. Restricted T-cell epitope diversity in the circumsporozoite protein from Plasmodium falciparum populations prevalent in Iran. .Am J Trop Med Hyg. ;76(6):1046-51 (2007)
	54	DQ521716.1	Iran	Zakeri S, Avazalipoor M, Mehrizi AA, Djadid ND, Snounou G. Restricted T-cell epitope diversity in the circumsporozoite protein from Plasmodium falciparum populations prevalent in Iran. .Am J Trop Med Hyg. ;76(6):1046-51 (2007)
	55	DQ521717.1	Iran	Zakeri S, Avazalipoor M, Mehrizi AA, Djadid ND, Snounou G. Restricted T-cell epitope diversity in the circumsporozoite protein from Plasmodium falciparum populations prevalent in Iran. .Am J Trop Med Hyg. ;76(6):1046-51 (2007)
	56	DQ521718.1	Iran	Zakeri S, Avazalipoor M, Mehrizi AA, Djadid ND, Snounou G. Restricted T-cell epitope diversity in the circumsporozoite protein from Plasmodium falciparum populations prevalent in Iran. .Am J Trop Med Hyg. ;76(6):1046-51 (2007)
	57	DQ521719.1	Iran	Zakeri S, Avazalipoor M, Mehrizi AA, Djadid ND, Snounou G. Restricted T-cell epitope diversity in the circumsporozoite protein from Plasmodium falciparum populations prevalent in Iran. .Am J Trop Med Hyg. ;76(6):1046-51 (2007)
	58	DQ521720.1	Iran	Zakeri S, Avazalipoor M, Mehrizi AA, Djadid ND, Snounou G. Restricted T-cell epitope diversity in the circumsporozoite protein from Plasmodium falciparum populations prevalent in Iran. .Am J Trop Med Hyg. ;76(6):1046-51 (2007)
	59	DQ521721.1	Iran	Zakeri S, Avazalipoor M, Mehrizi AA, Djadid ND, Snounou G. Restricted T-cell epitope diversity in the circumsporozoite protein from Plasmodium falciparum populations prevalent in Iran. .Am J Trop Med Hyg. ;76(6):1046-51 (2007)
	60	DQ521722.1	Iran	Zakeri S, Avazalipoor M, Mehrizi AA, Djadid ND, Snounou G. Restricted T-cell epitope diversity in the circumsporozoite protein from Plasmodium falciparum populations prevalent in Iran. .Am J Trop Med Hyg. ;76(6):1046-51 (2007)
	61	DQ521723.1	Iran	Zakeri S, Avazalipoor M, Mehrizi AA, Djadid ND, Snounou G. Restricted T-cell epitope diversity in the circumsporozoite protein from Plasmodium falciparum populations prevalent in Iran. .Am J Trop Med Hyg. ;76(6):1046-51 (2007)
	62	DQ521724.1	Iran	Zakeri S, Avazalipoor M, Mehrizi AA, Djadid ND, Snounou G. Restricted T-cell epitope diversity in the circumsporozoite protein from Plasmodium falciparum populations prevalent in Iran. .Am J Trop Med Hyg. ;76(6):1046-51 (2007)
	63	DQ521725.1	Iran	Zakeri S, Avazalipoor M, Mehrizi AA, Djadid ND, Snounou G. Restricted T-cell epitope diversity in the circumsporozoite protein from Plasmodium falciparum populations prevalent in Iran. .Am J Trop Med Hyg. ;76(6):1046-51 (2007)
	64	DQ521726.1	Iran	Zakeri S, Avazalipoor M, Mehrizi AA, Djadid ND, Snounou G. Restricted T-cell epitope diversity in the circumsporozoite protein from Plasmodium falciparum populations prevalent in Iran. .Am J Trop Med Hyg. ;76(6):1046-51 (2007)
	65	DQ521727.1	Iran	Zakeri S, Avazalipoor M, Mehrizi AA, Djadid ND, Snounou G. Restricted T-cell epitope diversity in the circumsporozoite protein from Plasmodium falciparum populations prevalent in Iran. .Am J Trop Med Hyg. ;76(6):1046-51 (2007)
	66	DQ521728.1	Iran	Zakeri S, Avazalipoor M, Mehrizi AA, Djadid ND, Snounou G. Restricted T-cell epitope diversity in the circumsporozoite protein from Plasmodium falciparum populations prevalent in Iran. .Am J Trop Med Hyg. ;76(6):1046-51 (2007)
	67	DQ521729.1	Iran	Zakeri S, Avazalipoor M, Mehrizi AA, Djadid ND, Snounou G. Restricted T-cell epitope diversity in the circumsporozoite protein from Plasmodium falciparum populations prevalent in Iran. .Am J Trop Med Hyg. ;76(6):1046-51 (2007)
	68	DQ521730.1	Iran	Zakeri S, Avazalipoor M, Mehrizi AA, Djadid ND, Snounou G. Restricted T-cell epitope diversity in the circumsporozoite protein from Plasmodium falciparum populations prevalent in Iran. .Am J Trop Med Hyg. ;76(6):1046-51 (2007)
	69	DQ521731.1	Iran	Zakeri S, Avazalipoor M, Mehrizi AA, Djadid ND, Snounou G. Restricted T-cell epitope diversity in the circumsporozoite protein from Plasmodium falciparum populations prevalent in Iran. .Am J Trop Med Hyg. ;76(6):1046-51 (2007)
	70	DQ521732.1	Iran	Zakeri S, Avazalipoor M, Mehrizi AA, Djadid ND, Snounou G. Restricted T-cell epitope diversity in the circumsporozoite protein from Plasmodium falciparum populations prevalent in Iran. .Am J Trop Med Hyg. ;76(6):1046-51 (2007)
	71	DQ521733.1	Iran	Zakeri S, Avazalipoor M, Mehrizi AA, Djadid ND, Snounou G. Restricted T-cell epitope diversity in the circumsporozoite protein from Plasmodium falciparum populations prevalent in Iran. .Am J Trop Med Hyg. ;76(6):1046-51 (2007)
	72	DQ521734.1	Iran	Zakeri S, Avazalipoor M, Mehrizi AA, Djadid ND, Snounou G. Restricted T-cell epitope diversity in the circumsporozoite protein from Plasmodium falciparum populations prevalent in Iran. .Am J Trop Med Hyg. ;76(6):1046-51 (2007)
	73	DQ521735.1	Iran	Zakeri S, Avazalipoor M, Mehrizi AA, Djadid ND, Snounou G. Restricted T-cell epitope diversity in the circumsporozoite protein from Plasmodium falciparum populations prevalent in Iran. .Am J Trop Med Hyg. ;76(6):1046-51 (2007)
	74	DQ521736.1	Iran	Zakeri S, Avazalipoor M, Mehrizi AA, Djadid ND, Snounou G. Restricted T-cell epitope diversity in the circumsporozoite protein from Plasmodium falciparum populations prevalent in Iran. .Am J Trop Med Hyg. ;76(6):1046-51 (2007)
	75	DQ521737.1	Iran	Zakeri S, Avazalipoor M, Mehrizi AA, Djadid ND, Snounou G. Restricted T-cell epitope diversity in the circumsporozoite protein from Plasmodium falciparum populations prevalent in Iran. .Am J Trop Med Hyg. ;76(6):1046-51 (2007)
	76	DQ521738.1	Iran	Zakeri S, Avazalipoor M, Mehrizi AA, Djadid ND, Snounou G. Restricted T-cell epitope diversity in the circumsporozoite protein from Plasmodium falciparum populations prevalent in Iran. .Am J Trop Med Hyg. ;76(6):1046-51 (2007)
	77	DQ521739.1	Iran	Zakeri S, Avazalipoor M, Mehrizi AA, Djadid ND, Snounou G. Restricted T-cell epitope diversity in the circumsporozoite protein from Plasmodium falciparum populations prevalent in Iran. .Am J Trop Med Hyg. ;76(6):1046-51 (2007)
	78	DQ521740.1	Iran	Zakeri S, Avazalipoor M, Mehrizi AA, Djadid ND, Snounou G. Restricted T-cell epitope diversity in the circumsporozoite protein from Plasmodium falciparum populations prevalent in Iran. .Am J Trop Med Hyg. ;76(6):1046-51 (2007)
	79	DQ521741.1	Iran	Zakeri S, Avazalipoor M, Mehrizi AA, Djadid ND, Snounou G. Restricted T-cell epitope diversity in the circumsporozoite protein from Plasmodium falciparum populations prevalent in Iran. .Am J Trop Med Hyg. ;76(6):1046-51 (2007)
	80	DQ521742.1	Iran	Zakeri S, Avazalipoor M, Mehrizi AA, Djadid ND, Snounou G. Restricted T-cell epitope diversity in the circumsporozoite protein from Plasmodium falciparum populations prevalent in Iran. .Am J Trop Med Hyg. ;76(6):1046-51 (2007)
	81	DQ521743.1	Iran	Zakeri S, Avazalipoor M, Mehrizi AA, Djadid ND, Snounou G. Restricted T-cell epitope diversity in the circumsporozoite protein from Plasmodium falciparum populations prevalent in Iran. .Am J Trop Med Hyg. ;76(6):1046-51 (2007)
	82	DQ521744.1	Iran	Zakeri S, Avazalipoor M, Mehrizi AA, Djadid ND, Snounou G. Restricted T-cell epitope diversity in the circumsporozoite protein from Plasmodium falciparum populations prevalent in Iran. .Am J Trop Med Hyg. ;76(6):1046-51 (2007)
	83	DQ521745.1	Iran	Zakeri S, Avazalipoor M, Mehrizi AA, Djadid ND, Snounou G. Restricted T-cell epitope diversity in the circumsporozoite protein from Plasmodium falciparum populations prevalent in Iran. .Am J Trop Med Hyg. ;76(6):1046-51 (2007)
	84	DQ521746.1	Iran	Zakeri S, Avazalipoor M, Mehrizi AA, Djadid ND, Snounou G. Restricted T-cell epitope diversity in the circumsporozoite protein from Plasmodium falciparum populations prevalent in Iran. .Am J Trop Med Hyg. ;76(6):1046-51 (2007)
	85	DQ521747.1	Iran	Zakeri S, Avazalipoor M, Mehrizi AA, Djadid ND, Snounou G. Restricted T-cell epitope diversity in the circumsporozoite protein from Plasmodium falciparum populations prevalent in Iran. .Am J Trop Med Hyg. ;76(6):1046-51 (2007)
	86	DQ521748.1	Iran	Zakeri S, Avazalipoor M, Mehrizi AA, Djadid ND, Snounou G. Restricted T-cell epitope diversity in the circumsporozoite protein from Plasmodium falciparum populations prevalent in Iran. .Am J Trop Med Hyg. ;76(6):1046-51 (2007)
	87	DQ521749.1	Iran	Zakeri S, Avazalipoor M, Mehrizi AA, Djadid ND, Snounou G. Restricted T-cell epitope diversity in the circumsporozoite protein from Plasmodium falciparum populations prevalent in Iran. .Am J Trop Med Hyg. ;76(6):1046-51 (2007)
	88	DQ521750.1	Iran	Zakeri S, Avazalipoor M, Mehrizi AA, Djadid ND, Snounou G. Restricted T-cell epitope diversity in the circumsporozoite protein from Plasmodium falciparum populations prevalent in Iran. .Am J Trop Med Hyg. ;76(6):1046-51 (2007)
	89	DQ521751.1	Iran	Zakeri S, Avazalipoor M, Mehrizi AA, Djadid ND, Snounou G. Restricted T-cell epitope diversity in the circumsporozoite protein from Plasmodium falciparum populations prevalent in Iran. .Am J Trop Med Hyg. ;76(6):1046-51 (2007)
	90	DQ521752.1	Iran	Zakeri S, Avazalipoor M, Mehrizi AA, Djadid ND, Snounou G. Restricted T-cell epitope diversity in the circumsporozoite protein from Plasmodium falciparum populations prevalent in Iran. .Am J Trop Med Hyg. ;76(6):1046-51 (2007)
	1	AJ269945.1	Myanmar	de Stricker,K., Vuust,J., Jepsen,S., Oeuvray,C. and Theisen,M. Sequence variation in the non-repeat region of the Plasmodium falciparum glutamate rich protein (GLURP) from Brazil, Senegalese and Burmese field isolates and from laboratory strains. (Unpublished)
	2	AJ269955.1	Myanmar	de Stricker,K., Vuust,J., Jepsen,S., Oeuvray,C. and Theisen,M. Sequence variation in the non-repeat region of the Plasmodium falciparum glutamate rich protein (GLURP) from Brazil, Senegalese and Burmese field isolates and from laboratory strains. (Unpublished)
	3	AJ269956.1	Myanmar	de Stricker,K., Vuust,J., Jepsen,S., Oeuvray,C. and Theisen,M. Sequence variation in the non-repeat region of the Plasmodium falciparum glutamate rich protein (GLURP) from Brazil, Senegalese and Burmese field isolates and from laboratory strains. (Unpublished)
	4	AJ269957.1	Myanmar	de Stricker,K., Vuust,J., Jepsen,S., Oeuvray,C. and Theisen,M. Sequence variation in the non-repeat region of the Plasmodium falciparum glutamate rich protein (GLURP) from Brazil, Senegalese and Burmese field isolates and from laboratory strains. (Unpublished)
	5	AJ269958.1	Myanmar	de Stricker,K., Vuust,J., Jepsen,S., Oeuvray,C. and Theisen,M. Sequence variation in the non-repeat region of the Plasmodium falciparum glutamate rich protein (GLURP) from Brazil, Senegalese and Burmese field isolates and from laboratory strains. (Unpublished)
	6	AJ269959.1	Myanmar	de Stricker,K., Vuust,J., Jepsen,S., Oeuvray,C. and Theisen,M. Sequence variation in the non-repeat region of the Plasmodium falciparum glutamate rich protein (GLURP) from Brazil, Senegalese and Burmese field isolates and from laboratory strains. (Unpublished)
	7	AJ269960.1	Myanmar	de Stricker,K., Vuust,J., Jepsen,S., Oeuvray,C. and Theisen,M. Sequence variation in the non-repeat region of the Plasmodium falciparum glutamate rich protein (GLURP) from Brazil, Senegalese and Burmese field isolates and from laboratory strains. (Unpublished)
	8	DQ193595.1	Myanmar	Jalloh A, van Thien H, Ferreira MU, Ohashi J, Matsuoka H, Kanbe T, Kikuchi A, Kawamoto F. Sequence variation in the T-cell epitopes of the Plasmodium falciparum circumsporozoite protein among field isolates is temporally stable: a 5-year longitudinal study in southern Vietnam. J Clin Microbiol 44(4):1229-35 (2006)
	1	FJ232142.1	Thailand	Putaporntip C, Jongwutiwes S, Hughes AL. Natural selection maintains a stable polymorphism at the circumsporozoite protein locus of Plasmodium falciparum in a low endemic area. Infect Genet Evol. 9(4):567-73 (2009).
	2	FJ232143.1	Thailand	Putaporntip C, Jongwutiwes S, Hughes AL. Natural selection maintains a stable polymorphism at the circumsporozoite protein locus of Plasmodium falciparum in a low endemic area. Infect Genet Evol. 9(4):567-73 (2009).
	3	FJ232144.1	Thailand	Putaporntip C, Jongwutiwes S, Hughes AL. Natural selection maintains a stable polymorphism at the circumsporozoite protein locus of Plasmodium falciparum in a low endemic area. Infect Genet Evol. 9(4):567-73 (2009).
	4	FJ232145.1	Thailand	Putaporntip C, Jongwutiwes S, Hughes AL. Natural selection maintains a stable polymorphism at the circumsporozoite protein locus of Plasmodium falciparum in a low endemic area. Infect Genet Evol. 9(4):567-73 (2009).
	5	FJ232146.1	Thailand	Putaporntip C, Jongwutiwes S, Hughes AL. Natural selection maintains a stable polymorphism at the circumsporozoite protein locus of Plasmodium falciparum in a low endemic area. Infect Genet Evol. 9(4):567-73 (2009).
	6	FJ232147.1	Thailand	Putaporntip C, Jongwutiwes S, Hughes AL. Natural selection maintains a stable polymorphism at the circumsporozoite protein locus of Plasmodium falciparum in a low endemic area. Infect Genet Evol. 9(4):567-73 (2009).
	7	FJ232148.1	Thailand	Putaporntip C, Jongwutiwes S, Hughes AL. Natural selection maintains a stable polymorphism at the circumsporozoite protein locus of Plasmodium falciparum in a low endemic area. Infect Genet Evol. 9(4):567-73 (2009).
	8	FJ232149.1	Thailand	Putaporntip C, Jongwutiwes S, Hughes AL. Natural selection maintains a stable polymorphism at the circumsporozoite protein locus of Plasmodium falciparum in a low endemic area. Infect Genet Evol. 9(4):567-73 (2009).
	9	FJ232150.1	Thailand	Putaporntip C, Jongwutiwes S, Hughes AL. Natural selection maintains a stable polymorphism at the circumsporozoite protein locus of Plasmodium falciparum in a low endemic area. Infect Genet Evol. 9(4):567-73 (2009).
	10	FJ232151.1	Thailand	Putaporntip C, Jongwutiwes S, Hughes AL. Natural selection maintains a stable polymorphism at the circumsporozoite protein locus of Plasmodium falciparum in a low endemic area. Infect Genet Evol. 9(4):567-73 (2009).
	11	FJ232152.1	Thailand	Putaporntip C, Jongwutiwes S, Hughes AL. Natural selection maintains a stable polymorphism at the circumsporozoite protein locus of Plasmodium falciparum in a low endemic area. Infect Genet Evol. 9(4):567-73 (2009).
	12	FJ232153.1	Thailand	Putaporntip C, Jongwutiwes S, Hughes AL. Natural selection maintains a stable polymorphism at the circumsporozoite protein locus of Plasmodium falciparum in a low endemic area. Infect Genet Evol. 9(4):567-73 (2009).
	13	FJ232154.1	Thailand	Putaporntip C, Jongwutiwes S, Hughes AL. Natural selection maintains a stable polymorphism at the circumsporozoite protein locus of Plasmodium falciparum in a low endemic area. Infect Genet Evol. 9(4):567-73 (2009).
	14	FJ232155.1	Thailand	Putaporntip C, Jongwutiwes S, Hughes AL. Natural selection maintains a stable polymorphism at the circumsporozoite protein locus of Plasmodium falciparum in a low endemic area. Infect Genet Evol. 9(4):567-73 (2009).
	15	FJ232156.1	Thailand	Putaporntip C, Jongwutiwes S, Hughes AL. Natural selection maintains a stable polymorphism at the circumsporozoite protein locus of Plasmodium falciparum in a low endemic area. Infect Genet Evol. 9(4):567-73 (2009).
	16	FJ232157.1	Thailand	Putaporntip C, Jongwutiwes S, Hughes AL. Natural selection maintains a stable polymorphism at the circumsporozoite protein locus of Plasmodium falciparum in a low endemic area. Infect Genet Evol. 9(4):567-73 (2009).
	17	FJ232158.1	Thailand	Putaporntip C, Jongwutiwes S, Hughes AL. Natural selection maintains a stable polymorphism at the circumsporozoite protein locus of Plasmodium falciparum in a low endemic area. Infect Genet Evol. 9(4):567-73 (2009).
	18	FJ232159.1	Thailand	Putaporntip C, Jongwutiwes S, Hughes AL. Natural selection maintains a stable polymorphism at the circumsporozoite protein locus of Plasmodium falciparum in a low endemic area. Infect Genet Evol. 9(4):567-73 (2009).
	19	FJ232160.1	Thailand	Putaporntip C, Jongwutiwes S, Hughes AL. Natural selection maintains a stable polymorphism at the circumsporozoite protein locus of Plasmodium falciparum in a low endemic area. Infect Genet Evol. 9(4):567-73 (2009).
	20	FJ232161.1	Thailand	Putaporntip C, Jongwutiwes S, Hughes AL. Natural selection maintains a stable polymorphism at the circumsporozoite protein locus of Plasmodium falciparum in a low endemic area. Infect Genet Evol. 9(4):567-73 (2009).
	21	FJ232162.1	Thailand	Putaporntip C, Jongwutiwes S, Hughes AL. Natural selection maintains a stable polymorphism at the circumsporozoite protein locus of Plasmodium falciparum in a low endemic area. Infect Genet Evol. 9(4):567-73 (2009).
	22	FJ232163.1	Thailand	Putaporntip C, Jongwutiwes S, Hughes AL. Natural selection maintains a stable polymorphism at the circumsporozoite protein locus of Plasmodium falciparum in a low endemic area. Infect Genet Evol. 9(4):567-73 (2009).
	23	FJ232164.1	Thailand	Putaporntip C, Jongwutiwes S, Hughes AL. Natural selection maintains a stable polymorphism at the circumsporozoite protein locus of Plasmodium falciparum in a low endemic area. Infect Genet Evol. 9(4):567-73 (2009).
	24	FJ232165.1	Thailand	Putaporntip C, Jongwutiwes S, Hughes AL. Natural selection maintains a stable polymorphism at the circumsporozoite protein locus of Plasmodium falciparum in a low endemic area. Infect Genet Evol. 9(4):567-73 (2009).
	25	FJ232166.1	Thailand	Putaporntip C, Jongwutiwes S, Hughes AL. Natural selection maintains a stable polymorphism at the circumsporozoite protein locus of Plasmodium falciparum in a low endemic area. Infect Genet Evol. 9(4):567-73 (2009).
	26	FJ232168.1	Thailand	Putaporntip C, Jongwutiwes S, Hughes AL. Natural selection maintains a stable polymorphism at the circumsporozoite protein locus of Plasmodium falciparum in a low endemic area. Infect Genet Evol. 9(4):567-73 (2009).
	27	FJ232169.1	Thailand	Putaporntip C, Jongwutiwes S, Hughes AL. Natural selection maintains a stable polymorphism at the circumsporozoite protein locus of Plasmodium falciparum in a low endemic area. Infect Genet Evol. 9(4):567-73 (2009).
	28	FJ232170.1	Thailand	Putaporntip C, Jongwutiwes S, Hughes AL. Natural selection maintains a stable polymorphism at the circumsporozoite protein locus of Plasmodium falciparum in a low endemic area. Infect Genet Evol. 9(4):567-73 (2009).
	29	FJ232171.1	Thailand	Putaporntip C, Jongwutiwes S, Hughes AL. Natural selection maintains a stable polymorphism at the circumsporozoite protein locus of Plasmodium falciparum in a low endemic area. Infect Genet Evol. 9(4):567-73 (2009).
	30	FJ232172.1	Thailand	Putaporntip C, Jongwutiwes S, Hughes AL. Natural selection maintains a stable polymorphism at the circumsporozoite protein locus of Plasmodium falciparum in a low endemic area. Infect Genet Evol. 9(4):567-73 (2009).
	31	FJ232173.1	Thailand	Putaporntip C, Jongwutiwes S, Hughes AL. Natural selection maintains a stable polymorphism at the circumsporozoite protein locus of Plasmodium falciparum in a low endemic area. Infect Genet Evol. 9(4):567-73 (2009).
	32	FJ232174.1	Thailand	Putaporntip C, Jongwutiwes S, Hughes AL. Natural selection maintains a stable polymorphism at the circumsporozoite protein locus of Plasmodium falciparum in a low endemic area. Infect Genet Evol. 9(4):567-73 (2009).
	33	FJ232175.1	Thailand	Putaporntip C, Jongwutiwes S, Hughes AL. Natural selection maintains a stable polymorphism at the circumsporozoite protein locus of Plasmodium falciparum in a low endemic area. Infect Genet Evol. 9(4):567-73 (2009).
	34	FJ232176.1	Thailand	Putaporntip C, Jongwutiwes S, Hughes AL. Natural selection maintains a stable polymorphism at the circumsporozoite protein locus of Plasmodium falciparum in a low endemic area. Infect Genet Evol. 9(4):567-73 (2009).
	35	FJ232177.1	Thailand	Putaporntip C, Jongwutiwes S, Hughes AL. Natural selection maintains a stable polymorphism at the circumsporozoite protein locus of Plasmodium falciparum in a low endemic area. Infect Genet Evol. 9(4):567-73 (2009).
	36	FJ232178.1	Thailand	Putaporntip C, Jongwutiwes S, Hughes AL. Natural selection maintains a stable polymorphism at the circumsporozoite protein locus of Plasmodium falciparum in a low endemic area. Infect Genet Evol. 9(4):567-73 (2009).
	37	FJ232179.1	Thailand	Putaporntip C, Jongwutiwes S, Hughes AL. Natural selection maintains a stable polymorphism at the circumsporozoite protein locus of Plasmodium falciparum in a low endemic area. Infect Genet Evol. 9(4):567-73 (2009).
	38	FJ232180.1	Thailand	Putaporntip C, Jongwutiwes S, Hughes AL. Natural selection maintains a stable polymorphism at the circumsporozoite protein locus of Plasmodium falciparum in a low endemic area. Infect Genet Evol. 9(4):567-73 (2009).
	39	FJ232181.1	Thailand	Putaporntip C, Jongwutiwes S, Hughes AL. Natural selection maintains a stable polymorphism at the circumsporozoite protein locus of Plasmodium falciparum in a low endemic area. Infect Genet Evol. 9(4):567-73 (2009).
	40	FJ232182.1	Thailand	Putaporntip C, Jongwutiwes S, Hughes AL. Natural selection maintains a stable polymorphism at the circumsporozoite protein locus of Plasmodium falciparum in a low endemic area. Infect Genet Evol. 9(4):567-73 (2009).
	41	FJ232183.1	Thailand	Putaporntip C, Jongwutiwes S, Hughes AL. Natural selection maintains a stable polymorphism at the circumsporozoite protein locus of Plasmodium falciparum in a low endemic area. Infect Genet Evol. 9(4):567-73 (2009).
	42	FJ232184.1	Thailand	Putaporntip C, Jongwutiwes S, Hughes AL. Natural selection maintains a stable polymorphism at the circumsporozoite protein locus of Plasmodium falciparum in a low endemic area. Infect Genet Evol. 9(4):567-73 (2009).
	43	FJ232185.1	Thailand	Putaporntip C, Jongwutiwes S, Hughes AL. Natural selection maintains a stable polymorphism at the circumsporozoite protein locus of Plasmodium falciparum in a low endemic area. Infect Genet Evol. 9(4):567-73 (2009).
	44	FJ232186.1	Thailand	Putaporntip C, Jongwutiwes S, Hughes AL. Natural selection maintains a stable polymorphism at the circumsporozoite protein locus of Plasmodium falciparum in a low endemic area. Infect Genet Evol. 9(4):567-73 (2009).
	45	FJ232187.1	Thailand	Putaporntip C, Jongwutiwes S, Hughes AL. Natural selection maintains a stable polymorphism at the circumsporozoite protein locus of Plasmodium falciparum in a low endemic area. Infect Genet Evol. 9(4):567-73 (2009).
	46	FJ232188.1	Thailand	Putaporntip C, Jongwutiwes S, Hughes AL. Natural selection maintains a stable polymorphism at the circumsporozoite protein locus of Plasmodium falciparum in a low endemic area. Infect Genet Evol. 9(4):567-73 (2009).
	47	FJ232189.1	Thailand	Putaporntip C, Jongwutiwes S, Hughes AL. Natural selection maintains a stable polymorphism at the circumsporozoite protein locus of Plasmodium falciparum in a low endemic area. Infect Genet Evol. 9(4):567-73 (2009).
	48	FJ232190.1	Thailand	Putaporntip C, Jongwutiwes S, Hughes AL. Natural selection maintains a stable polymorphism at the circumsporozoite protein locus of Plasmodium falciparum in a low endemic area. Infect Genet Evol. 9(4):567-73 (2009).
	49	FJ232191.1	Thailand	Putaporntip C, Jongwutiwes S, Hughes AL. Natural selection maintains a stable polymorphism at the circumsporozoite protein locus of Plasmodium falciparum in a low endemic area. Infect Genet Evol. 9(4):567-73 (2009).
	50	FJ232192.1	Thailand	Putaporntip C, Jongwutiwes S, Hughes AL. Natural selection maintains a stable polymorphism at the circumsporozoite protein locus of Plasmodium falciparum in a low endemic area. Infect Genet Evol. 9(4):567-73 (2009).
	51	FJ232193.1	Thailand	Putaporntip C, Jongwutiwes S, Hughes AL. Natural selection maintains a stable polymorphism at the circumsporozoite protein locus of Plasmodium falciparum in a low endemic area. Infect Genet Evol. 9(4):567-73 (2009).
	52	FJ232194.1	Thailand	Putaporntip C, Jongwutiwes S, Hughes AL. Natural selection maintains a stable polymorphism at the circumsporozoite protein locus of Plasmodium falciparum in a low endemic area. Infect Genet Evol. 9(4):567-73 (2009).
	53	FJ232195.1	Thailand	Putaporntip C, Jongwutiwes S, Hughes AL. Natural selection maintains a stable polymorphism at the circumsporozoite protein locus of Plasmodium falciparum in a low endemic area. Infect Genet Evol. 9(4):567-73 (2009).
	54	FJ232196.1	Thailand	Putaporntip C, Jongwutiwes S, Hughes AL. Natural selection maintains a stable polymorphism at the circumsporozoite protein locus of Plasmodium falciparum in a low endemic area. Infect Genet Evol. 9(4):567-73 (2009).
	55	FJ232197.1	Thailand	Putaporntip C, Jongwutiwes S, Hughes AL. Natural selection maintains a stable polymorphism at the circumsporozoite protein locus of Plasmodium falciparum in a low endemic area. Infect Genet Evol. 9(4):567-73 (2009).
	56	FJ232198.1	Thailand	Putaporntip C, Jongwutiwes S, Hughes AL. Natural selection maintains a stable polymorphism at the circumsporozoite protein locus of Plasmodium falciparum in a low endemic area. Infect Genet Evol. 9(4):567-73 (2009).
	57	FJ232199.1	Thailand	Putaporntip C, Jongwutiwes S, Hughes AL. Natural selection maintains a stable polymorphism at the circumsporozoite protein locus of Plasmodium falciparum in a low endemic area. Infect Genet Evol. 9(4):567-73 (2009).
	58	FJ232200.1	Thailand	Putaporntip C, Jongwutiwes S, Hughes AL. Natural selection maintains a stable polymorphism at the circumsporozoite protein locus of Plasmodium falciparum in a low endemic area. Infect Genet Evol. 9(4):567-73 (2009).
	59	FJ232201.1	Thailand	Putaporntip C, Jongwutiwes S, Hughes AL. Natural selection maintains a stable polymorphism at the circumsporozoite protein locus of Plasmodium falciparum in a low endemic area. Infect Genet Evol. 9(4):567-73 (2009).
	60	FJ232202.1	Thailand	Putaporntip C, Jongwutiwes S, Hughes AL. Natural selection maintains a stable polymorphism at the circumsporozoite protein locus of Plasmodium falciparum in a low endemic area. Infect Genet Evol. 9(4):567-73 (2009).
	61	FJ232203.1	Thailand	Putaporntip C, Jongwutiwes S, Hughes AL. Natural selection maintains a stable polymorphism at the circumsporozoite protein locus of Plasmodium falciparum in a low endemic area. Infect Genet Evol. 9(4):567-73 (2009).
	62	FJ232204.1	Thailand	Putaporntip C, Jongwutiwes S, Hughes AL. Natural selection maintains a stable polymorphism at the circumsporozoite protein locus of Plasmodium falciparum in a low endemic area. Infect Genet Evol. 9(4):567-73 (2009).
	63	FJ232205.1	Thailand	Putaporntip C, Jongwutiwes S, Hughes AL. Natural selection maintains a stable polymorphism at the circumsporozoite protein locus of Plasmodium falciparum in a low endemic area. Infect Genet Evol. 9(4):567-73 (2009).
	64	FJ232206.1	Thailand	Putaporntip C, Jongwutiwes S, Hughes AL. Natural selection maintains a stable polymorphism at the circumsporozoite protein locus of Plasmodium falciparum in a low endemic area. Infect Genet Evol. 9(4):567-73 (2009).
	65	FJ232207.1	Thailand	Putaporntip C, Jongwutiwes S, Hughes AL. Natural selection maintains a stable polymorphism at the circumsporozoite protein locus of Plasmodium falciparum in a low endemic area. Infect Genet Evol. 9(4):567-73 (2009).
	66	FJ232208.1	Thailand	Putaporntip C, Jongwutiwes S, Hughes AL. Natural selection maintains a stable polymorphism at the circumsporozoite protein locus of Plasmodium falciparum in a low endemic area. Infect Genet Evol. 9(4):567-73 (2009).
	67	FJ232209.1	Thailand	Putaporntip C, Jongwutiwes S, Hughes AL. Natural selection maintains a stable polymorphism at the circumsporozoite protein locus of Plasmodium falciparum in a low endemic area. Infect Genet Evol. 9(4):567-73 (2009).
	68	FJ232210.1	Thailand	Putaporntip C, Jongwutiwes S, Hughes AL. Natural selection maintains a stable polymorphism at the circumsporozoite protein locus of Plasmodium falciparum in a low endemic area. Infect Genet Evol. 9(4):567-73 (2009).
	69	FJ232211.1	Thailand	Putaporntip C, Jongwutiwes S, Hughes AL. Natural selection maintains a stable polymorphism at the circumsporozoite protein locus of Plasmodium falciparum in a low endemic area. Infect Genet Evol. 9(4):567-73 (2009).
	70	FJ232212.1	Thailand	Putaporntip C, Jongwutiwes S, Hughes AL. Natural selection maintains a stable polymorphism at the circumsporozoite protein locus of Plasmodium falciparum in a low endemic area. Infect Genet Evol. 9(4):567-73 (2009).
	71	FJ232213.1	Thailand	Putaporntip C, Jongwutiwes S, Hughes AL. Natural selection maintains a stable polymorphism at the circumsporozoite protein locus of Plasmodium falciparum in a low endemic area. Infect Genet Evol. 9(4):567-73 (2009).
	72	FJ232214.1	Thailand	Putaporntip C, Jongwutiwes S, Hughes AL. Natural selection maintains a stable polymorphism at the circumsporozoite protein locus of Plasmodium falciparum in a low endemic area. Infect Genet Evol. 9(4):567-73 (2009).
	73	FJ232215.1	Thailand	Putaporntip C, Jongwutiwes S, Hughes AL. Natural selection maintains a stable polymorphism at the circumsporozoite protein locus of Plasmodium falciparum in a low endemic area. Infect Genet Evol. 9(4):567-73 (2009).
	74	FJ232216.1	Thailand	Putaporntip C, Jongwutiwes S, Hughes AL. Natural selection maintains a stable polymorphism at the circumsporozoite protein locus of Plasmodium falciparum in a low endemic area. Infect Genet Evol. 9(4):567-73 (2009).
	75	FJ232217.1	Thailand	Putaporntip C, Jongwutiwes S, Hughes AL. Natural selection maintains a stable polymorphism at the circumsporozoite protein locus of Plasmodium falciparum in a low endemic area. Infect Genet Evol. 9(4):567-73 (2009).
	76	FJ232218.1	Thailand	Putaporntip C, Jongwutiwes S, Hughes AL. Natural selection maintains a stable polymorphism at the circumsporozoite protein locus of Plasmodium falciparum in a low endemic area. Infect Genet Evol. 9(4):567-73 (2009).
	77	FJ232219.1	Thailand	Putaporntip C, Jongwutiwes S, Hughes AL. Natural selection maintains a stable polymorphism at the circumsporozoite protein locus of Plasmodium falciparum in a low endemic area. Infect Genet Evol. 9(4):567-73 (2009).
	78	FJ232220.1	Thailand	Putaporntip C, Jongwutiwes S, Hughes AL. Natural selection maintains a stable polymorphism at the circumsporozoite protein locus of Plasmodium falciparum in a low endemic area. Infect Genet Evol. 9(4):567-73 (2009).
	79	FJ232221.1	Thailand	Putaporntip C, Jongwutiwes S, Hughes AL. Natural selection maintains a stable polymorphism at the circumsporozoite protein locus of Plasmodium falciparum in a low endemic area. Infect Genet Evol. 9(4):567-73 (2009).
	80	FJ232222.1	Thailand	Putaporntip C, Jongwutiwes S, Hughes AL. Natural selection maintains a stable polymorphism at the circumsporozoite protein locus of Plasmodium falciparum in a low endemic area. Infect Genet Evol. 9(4):567-73 (2009).
	81	FJ232223.1	Thailand	Putaporntip C, Jongwutiwes S, Hughes AL. Natural selection maintains a stable polymorphism at the circumsporozoite protein locus of Plasmodium falciparum in a low endemic area. Infect Genet Evol. 9(4):567-73 (2009).
	82	FJ232224.1	Thailand	Putaporntip C, Jongwutiwes S, Hughes AL. Natural selection maintains a stable polymorphism at the circumsporozoite protein locus of Plasmodium falciparum in a low endemic area. Infect Genet Evol. 9(4):567-73 (2009).
	83	FJ232225.1	Thailand	Putaporntip C, Jongwutiwes S, Hughes AL. Natural selection maintains a stable polymorphism at the circumsporozoite protein locus of Plasmodium falciparum in a low endemic area. Infect Genet Evol. 9(4):567-73 (2009).
	84	FJ232226.1	Thailand	Putaporntip C, Jongwutiwes S, Hughes AL. Natural selection maintains a stable polymorphism at the circumsporozoite protein locus of Plasmodium falciparum in a low endemic area. Infect Genet Evol. 9(4):567-73 (2009).
	85	FJ232227.1	Thailand	Putaporntip C, Jongwutiwes S, Hughes AL. Natural selection maintains a stable polymorphism at the circumsporozoite protein locus of Plasmodium falciparum in a low endemic area. Infect Genet Evol. 9(4):567-73 (2009).
	86	FJ232228.1	Thailand	Putaporntip C, Jongwutiwes S, Hughes AL. Natural selection maintains a stable polymorphism at the circumsporozoite protein locus of Plasmodium falciparum in a low endemic area. Infect Genet Evol. 9(4):567-73 (2009).
	87	FJ232229.1	Thailand	Putaporntip C, Jongwutiwes S, Hughes AL. Natural selection maintains a stable polymorphism at the circumsporozoite protein locus of Plasmodium falciparum in a low endemic area. Infect Genet Evol. 9(4):567-73 (2009).
	88	FJ232230.1	Thailand	Putaporntip C, Jongwutiwes S, Hughes AL. Natural selection maintains a stable polymorphism at the circumsporozoite protein locus of Plasmodium falciparum in a low endemic area. Infect Genet Evol. 9(4):567-73 (2009).
	89	FJ232231.1	Thailand	Putaporntip C, Jongwutiwes S, Hughes AL. Natural selection maintains a stable polymorphism at the circumsporozoite protein locus of Plasmodium falciparum in a low endemic area. Infect Genet Evol. 9(4):567-73 (2009).
	90	FJ232232.1	Thailand	Putaporntip C, Jongwutiwes S, Hughes AL. Natural selection maintains a stable polymorphism at the circumsporozoite protein locus of Plasmodium falciparum in a low endemic area. Infect Genet Evol. 9(4):567-73 (2009).
	91	FJ232233.1	Thailand	Putaporntip C, Jongwutiwes S, Hughes AL. Natural selection maintains a stable polymorphism at the circumsporozoite protein locus of Plasmodium falciparum in a low endemic area. Infect Genet Evol. 9(4):567-73 (2009).
	92	FJ232234.1	Thailand	Putaporntip C, Jongwutiwes S, Hughes AL. Natural selection maintains a stable polymorphism at the circumsporozoite protein locus of Plasmodium falciparum in a low endemic area. Infect Genet Evol. 9(4):567-73 (2009).
	93	FJ232235.1	Thailand	Putaporntip C, Jongwutiwes S, Hughes AL. Natural selection maintains a stable polymorphism at the circumsporozoite protein locus of Plasmodium falciparum in a low endemic area. Infect Genet Evol. 9(4):567-73 (2009).
	94	FJ232236.1	Thailand	Putaporntip C, Jongwutiwes S, Hughes AL. Natural selection maintains a stable polymorphism at the circumsporozoite protein locus of Plasmodium falciparum in a low endemic area. Infect Genet Evol. 9(4):567-73 (2009).
	95	FJ232237.1	Thailand	Putaporntip C, Jongwutiwes S, Hughes AL. Natural selection maintains a stable polymorphism at the circumsporozoite protein locus of Plasmodium falciparum in a low endemic area. Infect Genet Evol. 9(4):567-73 (2009).
	96	FJ232238.1	Thailand	Putaporntip C, Jongwutiwes S, Hughes AL. Natural selection maintains a stable polymorphism at the circumsporozoite protein locus of Plasmodium falciparum in a low endemic area. Infect Genet Evol. 9(4):567-73 (2009).
	97	FJ232239.1	Thailand	Putaporntip C, Jongwutiwes S, Hughes AL. Natural selection maintains a stable polymorphism at the circumsporozoite protein locus of Plasmodium falciparum in a low endemic area. Infect Genet Evol. 9(4):567-73 (2009).
	98	FJ232240.1	Thailand	Putaporntip C, Jongwutiwes S, Hughes AL. Natural selection maintains a stable polymorphism at the circumsporozoite protein locus of Plasmodium falciparum in a low endemic area. Infect Genet Evol. 9(4):567-73 (2009).
	99	FJ232241.1	Thailand	Putaporntip C, Jongwutiwes S, Hughes AL. Natural selection maintains a stable polymorphism at the circumsporozoite protein locus of Plasmodium falciparum in a low endemic area. Infect Genet Evol. 9(4):567-73 (2009).
	100	FJ232242.1	Thailand	Putaporntip C, Jongwutiwes S, Hughes AL. Natural selection maintains a stable polymorphism at the circumsporozoite protein locus of Plasmodium falciparum in a low endemic area. Infect Genet Evol. 9(4):567-73 (2009).
	101	FJ232243.1	Thailand	Putaporntip C, Jongwutiwes S, Hughes AL. Natural selection maintains a stable polymorphism at the circumsporozoite protein locus of Plasmodium falciparum in a low endemic area. Infect Genet Evol. 9(4):567-73 (2009).
	102	FJ232244.1	Thailand	Putaporntip C, Jongwutiwes S, Hughes AL. Natural selection maintains a stable polymorphism at the circumsporozoite protein locus of Plasmodium falciparum in a low endemic area. Infect Genet Evol. 9(4):567-73 (2009).
	103	FJ232245.1	Thailand	Putaporntip C, Jongwutiwes S, Hughes AL. Natural selection maintains a stable polymorphism at the circumsporozoite protein locus of Plasmodium falciparum in a low endemic area. Infect Genet Evol. 9(4):567-73 (2009).
	104	FJ232246.1	Thailand	Putaporntip C, Jongwutiwes S, Hughes AL. Natural selection maintains a stable polymorphism at the circumsporozoite protein locus of Plasmodium falciparum in a low endemic area. Infect Genet Evol. 9(4):567-73 (2009).
	105	FJ232247.1	Thailand	Putaporntip C, Jongwutiwes S, Hughes AL. Natural selection maintains a stable polymorphism at the circumsporozoite protein locus of Plasmodium falciparum in a low endemic area. Infect Genet Evol. 9(4):567-73 (2009).
	106	FJ232248.1	Thailand	Putaporntip C, Jongwutiwes S, Hughes AL. Natural selection maintains a stable polymorphism at the circumsporozoite protein locus of Plasmodium falciparum in a low endemic area. Infect Genet Evol. 9(4):567-73 (2009).
	107	FJ232249.1	Thailand	Putaporntip C, Jongwutiwes S, Hughes AL. Natural selection maintains a stable polymorphism at the circumsporozoite protein locus of Plasmodium falciparum in a low endemic area. Infect Genet Evol. 9(4):567-73 (2009).
	108	FJ232250.1	Thailand	Putaporntip C, Jongwutiwes S, Hughes AL. Natural selection maintains a stable polymorphism at the circumsporozoite protein locus of Plasmodium falciparum in a low endemic area. Infect Genet Evol. 9(4):567-73 (2009).
	109	FJ232251.1	Thailand	Putaporntip C, Jongwutiwes S, Hughes AL. Natural selection maintains a stable polymorphism at the circumsporozoite protein locus of Plasmodium falciparum in a low endemic area. Infect Genet Evol. 9(4):567-73 (2009).
	110	FJ232252.1	Thailand	Putaporntip C, Jongwutiwes S, Hughes AL. Natural selection maintains a stable polymorphism at the circumsporozoite protein locus of Plasmodium falciparum in a low endemic area. Infect Genet Evol. 9(4):567-73 (2009).
	111	FJ232253.1	Thailand	Putaporntip C, Jongwutiwes S, Hughes AL. Natural selection maintains a stable polymorphism at the circumsporozoite protein locus of Plasmodium falciparum in a low endemic area. Infect Genet Evol. 9(4):567-73 (2009).
	112	FJ232254.1	Thailand	Putaporntip C, Jongwutiwes S, Hughes AL. Natural selection maintains a stable polymorphism at the circumsporozoite protein locus of Plasmodium falciparum in a low endemic area. Infect Genet Evol. 9(4):567-73 (2009).
	113	FJ232255.1	Thailand	Putaporntip C, Jongwutiwes S, Hughes AL. Natural selection maintains a stable polymorphism at the circumsporozoite protein locus of Plasmodium falciparum in a low endemic area. Infect Genet Evol. 9(4):567-73 (2009).
	114	FJ232256.1	Thailand	Putaporntip C, Jongwutiwes S, Hughes AL. Natural selection maintains a stable polymorphism at the circumsporozoite protein locus of Plasmodium falciparum in a low endemic area. Infect Genet Evol. 9(4):567-73 (2009).
	115	FJ232257.1	Thailand	Putaporntip C, Jongwutiwes S, Hughes AL. Natural selection maintains a stable polymorphism at the circumsporozoite protein locus of Plasmodium falciparum in a low endemic area. Infect Genet Evol. 9(4):567-73 (2009).
	116	FJ232258.1	Thailand	Putaporntip C, Jongwutiwes S, Hughes AL. Natural selection maintains a stable polymorphism at the circumsporozoite protein locus of Plasmodium falciparum in a low endemic area. Infect Genet Evol. 9(4):567-73 (2009).
	117	FJ232259.1	Thailand	Putaporntip C, Jongwutiwes S, Hughes AL. Natural selection maintains a stable polymorphism at the circumsporozoite protein locus of Plasmodium falciparum in a low endemic area. Infect Genet Evol. 9(4):567-73 (2009).
	118	FJ232260.1	Thailand	Putaporntip C, Jongwutiwes S, Hughes AL. Natural selection maintains a stable polymorphism at the circumsporozoite protein locus of Plasmodium falciparum in a low endemic area. Infect Genet Evol. 9(4):567-73 (2009).
	119	FJ232261.1	Thailand	Putaporntip C, Jongwutiwes S, Hughes AL. Natural selection maintains a stable polymorphism at the circumsporozoite protein locus of Plasmodium falciparum in a low endemic area. Infect Genet Evol. 9(4):567-73 (2009).
	120	FJ232262.1	Thailand	Putaporntip C, Jongwutiwes S, Hughes AL. Natural selection maintains a stable polymorphism at the circumsporozoite protein locus of Plasmodium falciparum in a low endemic area. Infect Genet Evol. 9(4):567-73 (2009).
	121	FJ232263.1	Thailand	Putaporntip C, Jongwutiwes S, Hughes AL. Natural selection maintains a stable polymorphism at the circumsporozoite protein locus of Plasmodium falciparum in a low endemic area. Infect Genet Evol. 9(4):567-73 (2009).
	122	FJ232264.1	Thailand	Putaporntip C, Jongwutiwes S, Hughes AL. Natural selection maintains a stable polymorphism at the circumsporozoite protein locus of Plasmodium falciparum in a low endemic area. Infect Genet Evol. 9(4):567-73 (2009).
	123	FJ232265.1	Thailand	Putaporntip C, Jongwutiwes S, Hughes AL. Natural selection maintains a stable polymorphism at the circumsporozoite protein locus of Plasmodium falciparum in a low endemic area. Infect Genet Evol. 9(4):567-73 (2009).
	124	FJ232266.1	Thailand	Putaporntip C, Jongwutiwes S, Hughes AL. Natural selection maintains a stable polymorphism at the circumsporozoite protein locus of Plasmodium falciparum in a low endemic area. Infect Genet Evol. 9(4):567-73 (2009).
	125	FJ232267.1	Thailand	Putaporntip C, Jongwutiwes S, Hughes AL. Natural selection maintains a stable polymorphism at the circumsporozoite protein locus of Plasmodium falciparum in a low endemic area. Infect Genet Evol. 9(4):567-73 (2009).
	126	FJ232268.1	Thailand	Putaporntip C, Jongwutiwes S, Hughes AL. Natural selection maintains a stable polymorphism at the circumsporozoite protein locus of Plasmodium falciparum in a low endemic area. Infect Genet Evol. 9(4):567-73 (2009).
	127	FJ232269.1	Thailand	Putaporntip C, Jongwutiwes S, Hughes AL. Natural selection maintains a stable polymorphism at the circumsporozoite protein locus of Plasmodium falciparum in a low endemic area. Infect Genet Evol. 9(4):567-73 (2009).
	128	FJ232270.1	Thailand	Putaporntip C, Jongwutiwes S, Hughes AL. Natural selection maintains a stable polymorphism at the circumsporozoite protein locus of Plasmodium falciparum in a low endemic area. Infect Genet Evol. 9(4):567-73 (2009).
	129	FJ232271.1	Thailand	Putaporntip C, Jongwutiwes S, Hughes AL. Natural selection maintains a stable polymorphism at the circumsporozoite protein locus of Plasmodium falciparum in a low endemic area. Infect Genet Evol. 9(4):567-73 (2009).
	130	FJ232272.1	Thailand	Putaporntip C, Jongwutiwes S, Hughes AL. Natural selection maintains a stable polymorphism at the circumsporozoite protein locus of Plasmodium falciparum in a low endemic area. Infect Genet Evol. 9(4):567-73 (2009).
	131	FJ232273.1	Thailand	Putaporntip C, Jongwutiwes S, Hughes AL. Natural selection maintains a stable polymorphism at the circumsporozoite protein locus of Plasmodium falciparum in a low endemic area. Infect Genet Evol. 9(4):567-73 (2009).
	132	FJ232274.1	Thailand	Putaporntip C, Jongwutiwes S, Hughes AL. Natural selection maintains a stable polymorphism at the circumsporozoite protein locus of Plasmodium falciparum in a low endemic area. Infect Genet Evol. 9(4):567-73 (2009).
	133	FJ232275.1	Thailand	Putaporntip C, Jongwutiwes S, Hughes AL. Natural selection maintains a stable polymorphism at the circumsporozoite protein locus of Plasmodium falciparum in a low endemic area. Infect Genet Evol. 9(4):567-73 (2009).
	134	FJ232276.1	Thailand	Putaporntip C, Jongwutiwes S, Hughes AL. Natural selection maintains a stable polymorphism at the circumsporozoite protein locus of Plasmodium falciparum in a low endemic area. Infect Genet Evol. 9(4):567-73 (2009).
	135	FJ232277.1	Thailand	Putaporntip C, Jongwutiwes S, Hughes AL. Natural selection maintains a stable polymorphism at the circumsporozoite protein locus of Plasmodium falciparum in a low endemic area. Infect Genet Evol. 9(4):567-73 (2009).
	136	FJ232278.1	Thailand	Putaporntip C, Jongwutiwes S, Hughes AL. Natural selection maintains a stable polymorphism at the circumsporozoite protein locus of Plasmodium falciparum in a low endemic area. Infect Genet Evol. 9(4):567-73 (2009).
	137	FJ232279.1	Thailand	Putaporntip C, Jongwutiwes S, Hughes AL. Natural selection maintains a stable polymorphism at the circumsporozoite protein locus of Plasmodium falciparum in a low endemic area. Infect Genet Evol. 9(4):567-73 (2009).
	138	FJ232280.1	Thailand	Putaporntip C, Jongwutiwes S, Hughes AL. Natural selection maintains a stable polymorphism at the circumsporozoite protein locus of Plasmodium falciparum in a low endemic area. Infect Genet Evol. 9(4):567-73 (2009).
	139	FJ232281.1	Thailand	Putaporntip C, Jongwutiwes S, Hughes AL. Natural selection maintains a stable polymorphism at the circumsporozoite protein locus of Plasmodium falciparum in a low endemic area. Infect Genet Evol. 9(4):567-73 (2009).
	140	FJ232282.1	Thailand	Putaporntip C, Jongwutiwes S, Hughes AL. Natural selection maintains a stable polymorphism at the circumsporozoite protein locus of Plasmodium falciparum in a low endemic area. Infect Genet Evol. 9(4):567-73 (2009).
	141	FJ232283.1	Thailand	Putaporntip C, Jongwutiwes S, Hughes AL. Natural selection maintains a stable polymorphism at the circumsporozoite protein locus of Plasmodium falciparum in a low endemic area. Infect Genet Evol. 9(4):567-73 (2009).
	142	FJ232284.1	Thailand	Putaporntip C, Jongwutiwes S, Hughes AL. Natural selection maintains a stable polymorphism at the circumsporozoite protein locus of Plasmodium falciparum in a low endemic area. Infect Genet Evol. 9(4):567-73 (2009).
	143	FJ232285.1	Thailand	Putaporntip C, Jongwutiwes S, Hughes AL. Natural selection maintains a stable polymorphism at the circumsporozoite protein locus of Plasmodium falciparum in a low endemic area. Infect Genet Evol. 9(4):567-73 (2009).
	144	FJ232286.1	Thailand	Putaporntip C, Jongwutiwes S, Hughes AL. Natural selection maintains a stable polymorphism at the circumsporozoite protein locus of Plasmodium falciparum in a low endemic area. Infect Genet Evol. 9(4):567-73 (2009).
	145	FJ232287.1	Thailand	Putaporntip C, Jongwutiwes S, Hughes AL. Natural selection maintains a stable polymorphism at the circumsporozoite protein locus of Plasmodium falciparum in a low endemic area. Infect Genet Evol. 9(4):567-73 (2009).
	146	FJ232288.1	Thailand	Putaporntip C, Jongwutiwes S, Hughes AL. Natural selection maintains a stable polymorphism at the circumsporozoite protein locus of Plasmodium falciparum in a low endemic area. Infect Genet Evol. 9(4):567-73 (2009).
	147	FJ232289.1	Thailand	Putaporntip C, Jongwutiwes S, Hughes AL. Natural selection maintains a stable polymorphism at the circumsporozoite protein locus of Plasmodium falciparum in a low endemic area. Infect Genet Evol. 9(4):567-73 (2009).
	148	FJ232290.1	Thailand	Putaporntip C, Jongwutiwes S, Hughes AL. Natural selection maintains a stable polymorphism at the circumsporozoite protein locus of Plasmodium falciparum in a low endemic area. Infect Genet Evol. 9(4):567-73 (2009).
	149	FJ232291.1	Thailand	Putaporntip C, Jongwutiwes S, Hughes AL. Natural selection maintains a stable polymorphism at the circumsporozoite protein locus of Plasmodium falciparum in a low endemic area. Infect Genet Evol. 9(4):567-73 (2009).
	150	FJ232292.1	Thailand	Putaporntip C, Jongwutiwes S, Hughes AL. Natural selection maintains a stable polymorphism at the circumsporozoite protein locus of Plasmodium falciparum in a low endemic area. Infect Genet Evol. 9(4):567-73 (2009).
	151	FJ232293.1	Thailand	Putaporntip C, Jongwutiwes S, Hughes AL. Natural selection maintains a stable polymorphism at the circumsporozoite protein locus of Plasmodium falciparum in a low endemic area. Infect Genet Evol. 9(4):567-73 (2009).
	152	FJ232294.1	Thailand	Putaporntip C, Jongwutiwes S, Hughes AL. Natural selection maintains a stable polymorphism at the circumsporozoite protein locus of Plasmodium falciparum in a low endemic area. Infect Genet Evol. 9(4):567-73 (2009).
	153	FJ232295.1	Thailand	Putaporntip C, Jongwutiwes S, Hughes AL. Natural selection maintains a stable polymorphism at the circumsporozoite protein locus of Plasmodium falciparum in a low endemic area. Infect Genet Evol. 9(4):567-73 (2009).
	154	FJ232296.1	Thailand	Putaporntip C, Jongwutiwes S, Hughes AL. Natural selection maintains a stable polymorphism at the circumsporozoite protein locus of Plasmodium falciparum in a low endemic area. Infect Genet Evol. 9(4):567-73 (2009).
	155	FJ232297.1	Thailand	Putaporntip C, Jongwutiwes S, Hughes AL. Natural selection maintains a stable polymorphism at the circumsporozoite protein locus of Plasmodium falciparum in a low endemic area. Infect Genet Evol. 9(4):567-73 (2009).
	156	FJ232298.1	Thailand	Putaporntip C, Jongwutiwes S, Hughes AL. Natural selection maintains a stable polymorphism at the circumsporozoite protein locus of Plasmodium falciparum in a low endemic area. Infect Genet Evol. 9(4):567-73 (2009).
	157	FJ232299.1	Thailand	Putaporntip C, Jongwutiwes S, Hughes AL. Natural selection maintains a stable polymorphism at the circumsporozoite protein locus of Plasmodium falciparum in a low endemic area. Infect Genet Evol. 9(4):567-73 (2009).
	158	FJ232300.1	Thailand	Putaporntip C, Jongwutiwes S, Hughes AL. Natural selection maintains a stable polymorphism at the circumsporozoite protein locus of Plasmodium falciparum in a low endemic area. Infect Genet Evol. 9(4):567-73 (2009).
	159	FJ232301.1	Thailand	Putaporntip C, Jongwutiwes S, Hughes AL. Natural selection maintains a stable polymorphism at the circumsporozoite protein locus of Plasmodium falciparum in a low endemic area. Infect Genet Evol. 9(4):567-73 (2009).
	160	FJ232302.1	Thailand	Putaporntip C, Jongwutiwes S, Hughes AL. Natural selection maintains a stable polymorphism at the circumsporozoite protein locus of Plasmodium falciparum in a low endemic area. Infect Genet Evol. 9(4):567-73 (2009).
	161	FJ232303.1	Thailand	Putaporntip C, Jongwutiwes S, Hughes AL. Natural selection maintains a stable polymorphism at the circumsporozoite protein locus of Plasmodium falciparum in a low endemic area. Infect Genet Evol. 9(4):567-73 (2009).
	162	FJ232304.1	Thailand	Putaporntip C, Jongwutiwes S, Hughes AL. Natural selection maintains a stable polymorphism at the circumsporozoite protein locus of Plasmodium falciparum in a low endemic area. Infect Genet Evol. 9(4):567-73 (2009).
	163	FJ232305.1	Thailand	Putaporntip C, Jongwutiwes S, Hughes AL. Natural selection maintains a stable polymorphism at the circumsporozoite protein locus of Plasmodium falciparum in a low endemic area. Infect Genet Evol. 9(4):567-73 (2009).
	164	FJ232306.1	Thailand	Putaporntip C, Jongwutiwes S, Hughes AL. Natural selection maintains a stable polymorphism at the circumsporozoite protein locus of Plasmodium falciparum in a low endemic area. Infect Genet Evol. 9(4):567-73 (2009).
	165	FJ232307.1	Thailand	Putaporntip C, Jongwutiwes S, Hughes AL. Natural selection maintains a stable polymorphism at the circumsporozoite protein locus of Plasmodium falciparum in a low endemic area. Infect Genet Evol. 9(4):567-73 (2009).
	166	FJ232308.1	Thailand	Putaporntip C, Jongwutiwes S, Hughes AL. Natural selection maintains a stable polymorphism at the circumsporozoite protein locus of Plasmodium falciparum in a low endemic area. Infect Genet Evol. 9(4):567-73 (2009).
	167	FJ232309.1	Thailand	Putaporntip C, Jongwutiwes S, Hughes AL. Natural selection maintains a stable polymorphism at the circumsporozoite protein locus of Plasmodium falciparum in a low endemic area. Infect Genet Evol. 9(4):567-73 (2009).
	168	FJ232310.1	Thailand	Putaporntip C, Jongwutiwes S, Hughes AL. Natural selection maintains a stable polymorphism at the circumsporozoite protein locus of Plasmodium falciparum in a low endemic area. Infect Genet Evol. 9(4):567-73 (2009).
	169	FJ232311.1	Thailand	Putaporntip C, Jongwutiwes S, Hughes AL. Natural selection maintains a stable polymorphism at the circumsporozoite protein locus of Plasmodium falciparum in a low endemic area. Infect Genet Evol. 9(4):567-73 (2009).
	170	FJ232312.1	Thailand	Putaporntip C, Jongwutiwes S, Hughes AL. Natural selection maintains a stable polymorphism at the circumsporozoite protein locus of Plasmodium falciparum in a low endemic area. Infect Genet Evol. 9(4):567-73 (2009).
	171	FJ232313.1	Thailand	Putaporntip C, Jongwutiwes S, Hughes AL. Natural selection maintains a stable polymorphism at the circumsporozoite protein locus of Plasmodium falciparum in a low endemic area. Infect Genet Evol. 9(4):567-73 (2009).
	172	FJ232314.1	Thailand	Putaporntip C, Jongwutiwes S, Hughes AL. Natural selection maintains a stable polymorphism at the circumsporozoite protein locus of Plasmodium falciparum in a low endemic area. Infect Genet Evol. 9(4):567-73 (2009).
	173	FJ232315.1	Thailand	Putaporntip C, Jongwutiwes S, Hughes AL. Natural selection maintains a stable polymorphism at the circumsporozoite protein locus of Plasmodium falciparum in a low endemic area. Infect Genet Evol. 9(4):567-73 (2009).
	174	FJ232316.1	Thailand	Putaporntip C, Jongwutiwes S, Hughes AL. Natural selection maintains a stable polymorphism at the circumsporozoite protein locus of Plasmodium falciparum in a low endemic area. Infect Genet Evol. 9(4):567-73 (2009).
	175	FJ232317.1	Thailand	Putaporntip C, Jongwutiwes S, Hughes AL. Natural selection maintains a stable polymorphism at the circumsporozoite protein locus of Plasmodium falciparum in a low endemic area. Infect Genet Evol. 9(4):567-73 (2009).
	176	FJ232318.1	Thailand	Putaporntip C, Jongwutiwes S, Hughes AL. Natural selection maintains a stable polymorphism at the circumsporozoite protein locus of Plasmodium falciparum in a low endemic area. Infect Genet Evol. 9(4):567-73 (2009).
	177	FJ232319.1	Thailand	Putaporntip C, Jongwutiwes S, Hughes AL. Natural selection maintains a stable polymorphism at the circumsporozoite protein locus of Plasmodium falciparum in a low endemic area. Infect Genet Evol. 9(4):567-73 (2009).
	178	FJ232320.1	Thailand	Putaporntip C, Jongwutiwes S, Hughes AL. Natural selection maintains a stable polymorphism at the circumsporozoite protein locus of Plasmodium falciparum in a low endemic area. Infect Genet Evol. 9(4):567-73 (2009).
	179	FJ232321.1	Thailand	Putaporntip C, Jongwutiwes S, Hughes AL. Natural selection maintains a stable polymorphism at the circumsporozoite protein locus of Plasmodium falciparum in a low endemic area. Infect Genet Evol. 9(4):567-73 (2009).
	180	FJ232322.1	Thailand	Putaporntip C, Jongwutiwes S, Hughes AL. Natural selection maintains a stable polymorphism at the circumsporozoite protein locus of Plasmodium falciparum in a low endemic area. Infect Genet Evol. 9(4):567-73 (2009).
	181	FJ232323.1	Thailand	Putaporntip C, Jongwutiwes S, Hughes AL. Natural selection maintains a stable polymorphism at the circumsporozoite protein locus of Plasmodium falciparum in a low endemic area. Infect Genet Evol. 9(4):567-73 (2009).
	182	FJ232324.1	Thailand	Putaporntip C, Jongwutiwes S, Hughes AL. Natural selection maintains a stable polymorphism at the circumsporozoite protein locus of Plasmodium falciparum in a low endemic area. Infect Genet Evol. 9(4):567-73 (2009).
	183	FJ232325.1	Thailand	Putaporntip C, Jongwutiwes S, Hughes AL. Natural selection maintains a stable polymorphism at the circumsporozoite protein locus of Plasmodium falciparum in a low endemic area. Infect Genet Evol. 9(4):567-73 (2009).
	184	FJ232326.1	Thailand	Putaporntip C, Jongwutiwes S, Hughes AL. Natural selection maintains a stable polymorphism at the circumsporozoite protein locus of Plasmodium falciparum in a low endemic area. Infect Genet Evol. 9(4):567-73 (2009).
	185	FJ232327.1	Thailand	Putaporntip C, Jongwutiwes S, Hughes AL. Natural selection maintains a stable polymorphism at the circumsporozoite protein locus of Plasmodium falciparum in a low endemic area. Infect Genet Evol. 9(4):567-73 (2009).
	186	FJ232328.1	Thailand	Putaporntip C, Jongwutiwes S, Hughes AL. Natural selection maintains a stable polymorphism at the circumsporozoite protein locus of Plasmodium falciparum in a low endemic area. Infect Genet Evol. 9(4):567-73 (2009).
	187	FJ232329.1	Thailand	Putaporntip C, Jongwutiwes S, Hughes AL. Natural selection maintains a stable polymorphism at the circumsporozoite protein locus of Plasmodium falciparum in a low endemic area. Infect Genet Evol. 9(4):567-73 (2009).
	188	FJ232330.1	Thailand	Putaporntip C, Jongwutiwes S, Hughes AL. Natural selection maintains a stable polymorphism at the circumsporozoite protein locus of Plasmodium falciparum in a low endemic area. Infect Genet Evol. 9(4):567-73 (2009).
	189	FJ232331.1	Thailand	Putaporntip C, Jongwutiwes S, Hughes AL. Natural selection maintains a stable polymorphism at the circumsporozoite protein locus of Plasmodium falciparum in a low endemic area. Infect Genet Evol. 9(4):567-73 (2009).
	190	FJ232332.1	Thailand	Putaporntip C, Jongwutiwes S, Hughes AL. Natural selection maintains a stable polymorphism at the circumsporozoite protein locus of Plasmodium falciparum in a low endemic area. Infect Genet Evol. 9(4):567-73 (2009).
	191	FJ232333.1	Thailand	Putaporntip C, Jongwutiwes S, Hughes AL. Natural selection maintains a stable polymorphism at the circumsporozoite protein locus of Plasmodium falciparum in a low endemic area. Infect Genet Evol. 9(4):567-73 (2009).
	192	FJ232334.1	Thailand	Putaporntip C, Jongwutiwes S, Hughes AL. Natural selection maintains a stable polymorphism at the circumsporozoite protein locus of Plasmodium falciparum in a low endemic area. Infect Genet Evol. 9(4):567-73 (2009).
	193	FJ232335.1	Thailand	Putaporntip C, Jongwutiwes S, Hughes AL. Natural selection maintains a stable polymorphism at the circumsporozoite protein locus of Plasmodium falciparum in a low endemic area. Infect Genet Evol. 9(4):567-73 (2009).
	194	FJ232336.1	Thailand	Putaporntip C, Jongwutiwes S, Hughes AL. Natural selection maintains a stable polymorphism at the circumsporozoite protein locus of Plasmodium falciparum in a low endemic area. Infect Genet Evol. 9(4):567-73 (2009).
	195	FJ232337.1	Thailand	Putaporntip C, Jongwutiwes S, Hughes AL. Natural selection maintains a stable polymorphism at the circumsporozoite protein locus of Plasmodium falciparum in a low endemic area. Infect Genet Evol. 9(4):567-73 (2009).
	196	FJ232338.1	Thailand	Putaporntip C, Jongwutiwes S, Hughes AL. Natural selection maintains a stable polymorphism at the circumsporozoite protein locus of Plasmodium falciparum in a low endemic area. Infect Genet Evol. 9(4):567-73 (2009).
	197	FJ232339.1	Thailand	Putaporntip C, Jongwutiwes S, Hughes AL. Natural selection maintains a stable polymorphism at the circumsporozoite protein locus of Plasmodium falciparum in a low endemic area. Infect Genet Evol. 9(4):567-73 (2009).
	198	FJ232340.1	Thailand	Putaporntip C, Jongwutiwes S, Hughes AL. Natural selection maintains a stable polymorphism at the circumsporozoite protein locus of Plasmodium falciparum in a low endemic area. Infect Genet Evol. 9(4):567-73 (2009).
	199	FJ232341.1	Thailand	Putaporntip C, Jongwutiwes S, Hughes AL. Natural selection maintains a stable polymorphism at the circumsporozoite protein locus of Plasmodium falciparum in a low endemic area. Infect Genet Evol. 9(4):567-73 (2009).
	200	FJ232342.1	Thailand	Putaporntip C, Jongwutiwes S, Hughes AL. Natural selection maintains a stable polymorphism at the circumsporozoite protein locus of Plasmodium falciparum in a low endemic area. Infect Genet Evol. 9(4):567-73 (2009).
	201	FJ232343.1	Thailand	Putaporntip C, Jongwutiwes S, Hughes AL. Natural selection maintains a stable polymorphism at the circumsporozoite protein locus of Plasmodium falciparum in a low endemic area. Infect Genet Evol. 9(4):567-73 (2009).
	202	FJ232344.1	Thailand	Putaporntip C, Jongwutiwes S, Hughes AL. Natural selection maintains a stable polymorphism at the circumsporozoite protein locus of Plasmodium falciparum in a low endemic area. Infect Genet Evol. 9(4):567-73 (2009).
	203	FJ232345.1	Thailand	Putaporntip C, Jongwutiwes S, Hughes AL. Natural selection maintains a stable polymorphism at the circumsporozoite protein locus of Plasmodium falciparum in a low endemic area. Infect Genet Evol. 9(4):567-73 (2009).
	204	FJ232346.1	Thailand	Putaporntip C, Jongwutiwes S, Hughes AL. Natural selection maintains a stable polymorphism at the circumsporozoite protein locus of Plasmodium falciparum in a low endemic area. Infect Genet Evol. 9(4):567-73 (2009).
	205	FJ232347.1	Thailand	Putaporntip C, Jongwutiwes S, Hughes AL. Natural selection maintains a stable polymorphism at the circumsporozoite protein locus of Plasmodium falciparum in a low endemic area. Infect Genet Evol. 9(4):567-73 (2009).
	206	FJ232348.1	Thailand	Putaporntip C, Jongwutiwes S, Hughes AL. Natural selection maintains a stable polymorphism at the circumsporozoite protein locus of Plasmodium falciparum in a low endemic area. Infect Genet Evol. 9(4):567-73 (2009).
	207	FJ232349.1	Thailand	Putaporntip C, Jongwutiwes S, Hughes AL. Natural selection maintains a stable polymorphism at the circumsporozoite protein locus of Plasmodium falciparum in a low endemic area. Infect Genet Evol. 9(4):567-73 (2009).
	208	FJ232350.1	Thailand	Putaporntip C, Jongwutiwes S, Hughes AL. Natural selection maintains a stable polymorphism at the circumsporozoite protein locus of Plasmodium falciparum in a low endemic area. Infect Genet Evol. 9(4):567-73 (2009).
	209	FJ232351.1	Thailand	Putaporntip C, Jongwutiwes S, Hughes AL. Natural selection maintains a stable polymorphism at the circumsporozoite protein locus of Plasmodium falciparum in a low endemic area. Infect Genet Evol. 9(4):567-73 (2009).
	210	FJ232352.1	Thailand	Putaporntip C, Jongwutiwes S, Hughes AL. Natural selection maintains a stable polymorphism at the circumsporozoite protein locus of Plasmodium falciparum in a low endemic area. Infect Genet Evol. 9(4):567-73 (2009).
	211	FJ232353.1	Thailand	Putaporntip C, Jongwutiwes S, Hughes AL. Natural selection maintains a stable polymorphism at the circumsporozoite protein locus of Plasmodium falciparum in a low endemic area. Infect Genet Evol. 9(4):567-73 (2009).
	212	FJ232354.1	Thailand	Putaporntip C, Jongwutiwes S, Hughes AL. Natural selection maintains a stable polymorphism at the circumsporozoite protein locus of Plasmodium falciparum in a low endemic area. Infect Genet Evol. 9(4):567-73 (2009).
	213	FJ232355.1	Thailand	Putaporntip C, Jongwutiwes S, Hughes AL. Natural selection maintains a stable polymorphism at the circumsporozoite protein locus of Plasmodium falciparum in a low endemic area. Infect Genet Evol. 9(4):567-73 (2009).
	214	FJ232356.1	Thailand	Putaporntip C, Jongwutiwes S, Hughes AL. Natural selection maintains a stable polymorphism at the circumsporozoite protein locus of Plasmodium falciparum in a low endemic area. Infect Genet Evol. 9(4):567-73 (2009).
	215	FJ232357.1	Thailand	Putaporntip C, Jongwutiwes S, Hughes AL. Natural selection maintains a stable polymorphism at the circumsporozoite protein locus of Plasmodium falciparum in a low endemic area. Infect Genet Evol. 9(4):567-73 (2009).
	216	FJ232358.1	Thailand	Putaporntip C, Jongwutiwes S, Hughes AL. Natural selection maintains a stable polymorphism at the circumsporozoite protein locus of Plasmodium falciparum in a low endemic area. Infect Genet Evol. 9(4):567-73 (2009).
	217	FJ232359.1	Thailand	Putaporntip C, Jongwutiwes S, Hughes AL. Natural selection maintains a stable polymorphism at the circumsporozoite protein locus of Plasmodium falciparum in a low endemic area. Infect Genet Evol. 9(4):567-73 (2009).
	218	FJ232360.1	Thailand	Putaporntip C, Jongwutiwes S, Hughes AL. Natural selection maintains a stable polymorphism at the circumsporozoite protein locus of Plasmodium falciparum in a low endemic area. Infect Genet Evol. 9(4):567-73 (2009).
	219	FJ232361.1	Thailand	Putaporntip C, Jongwutiwes S, Hughes AL. Natural selection maintains a stable polymorphism at the circumsporozoite protein locus of Plasmodium falciparum in a low endemic area. Infect Genet Evol. 9(4):567-73 (2009).
	220	FJ232362.1	Thailand	Putaporntip C, Jongwutiwes S, Hughes AL. Natural selection maintains a stable polymorphism at the circumsporozoite protein locus of Plasmodium falciparum in a low endemic area. Infect Genet Evol. 9(4):567-73 (2009).
	221	FJ232363.1	Thailand	Putaporntip C, Jongwutiwes S, Hughes AL. Natural selection maintains a stable polymorphism at the circumsporozoite protein locus of Plasmodium falciparum in a low endemic area. Infect Genet Evol. 9(4):567-73 (2009).
	222	FJ232364.1	Thailand	Putaporntip C, Jongwutiwes S, Hughes AL. Natural selection maintains a stable polymorphism at the circumsporozoite protein locus of Plasmodium falciparum in a low endemic area. Infect Genet Evol. 9(4):567-73 (2009).
	223	GQ890702.1	Thailand	Jongwutiwes S, Putaporntip C, Hughes AL. Bottleneck effects on vaccine-candidate antigen diversity of malaria parasites in Thailand. Vaccine. 19;28(18):3112-7. (2010)
	224	GQ890703.1	Thailand	Jongwutiwes S, Putaporntip C, Hughes AL. Bottleneck effects on vaccine-candidate antigen diversity of malaria parasites in Thailand. Vaccine. 19;28(18):3112-7. (2010)
	225	GQ890704.1	Thailand	Jongwutiwes S, Putaporntip C, Hughes AL. Bottleneck effects on vaccine-candidate antigen diversity of malaria parasites in Thailand. Vaccine. 19;28(18):3112-7. (2010)
	226	GQ890705.1	Thailand	Jongwutiwes S, Putaporntip C, Hughes AL. Bottleneck effects on vaccine-candidate antigen diversity of malaria parasites in Thailand. Vaccine. 19;28(18):3112-7. (2010)
	227	GQ890706.1	Thailand	Jongwutiwes S, Putaporntip C, Hughes AL. Bottleneck effects on vaccine-candidate antigen diversity of malaria parasites in Thailand. Vaccine. 19;28(18):3112-7. (2010)
	228	GQ890707.1	Thailand	Jongwutiwes S, Putaporntip C, Hughes AL. Bottleneck effects on vaccine-candidate antigen diversity of malaria parasites in Thailand. Vaccine. 19;28(18):3112-7. (2010)
	229	GQ890708.1	Thailand	Jongwutiwes S, Putaporntip C, Hughes AL. Bottleneck effects on vaccine-candidate antigen diversity of malaria parasites in Thailand. Vaccine. 19;28(18):3112-7. (2010)
	230	GQ890709.1	Thailand	Jongwutiwes S, Putaporntip C, Hughes AL. Bottleneck effects on vaccine-candidate antigen diversity of malaria parasites in Thailand. Vaccine. 19;28(18):3112-7. (2010)
	231	GQ890710.1	Thailand	Jongwutiwes S, Putaporntip C, Hughes AL. Bottleneck effects on vaccine-candidate antigen diversity of malaria parasites in Thailand. Vaccine. 19;28(18):3112-7. (2010)
	232	GQ890711.1	Thailand	Jongwutiwes S, Putaporntip C, Hughes AL. Bottleneck effects on vaccine-candidate antigen diversity of malaria parasites in Thailand. Vaccine. 19;28(18):3112-7. (2010)
	233	GQ890712.1	Thailand	Jongwutiwes S, Putaporntip C, Hughes AL. Bottleneck effects on vaccine-candidate antigen diversity of malaria parasites in Thailand. Vaccine. 19;28(18):3112-7. (2010)
	234	GQ890713.1	Thailand	Jongwutiwes S, Putaporntip C, Hughes AL. Bottleneck effects on vaccine-candidate antigen diversity of malaria parasites in Thailand. Vaccine. 19;28(18):3112-7. (2010)
	235	GQ890714.1	Thailand	Jongwutiwes S, Putaporntip C, Hughes AL. Bottleneck effects on vaccine-candidate antigen diversity of malaria parasites in Thailand. Vaccine. 19;28(18):3112-7. (2010)
	236	GQ890715.1	Thailand	Jongwutiwes S, Putaporntip C, Hughes AL. Bottleneck effects on vaccine-candidate antigen diversity of malaria parasites in Thailand. Vaccine. 19;28(18):3112-7. (2010)
	237	GQ890716.1	Thailand	Jongwutiwes S, Putaporntip C, Hughes AL. Bottleneck effects on vaccine-candidate antigen diversity of malaria parasites in Thailand. Vaccine. 19;28(18):3112-7. (2010)
	238	GQ890717.1	Thailand	Jongwutiwes S, Putaporntip C, Hughes AL. Bottleneck effects on vaccine-candidate antigen diversity of malaria parasites in Thailand. Vaccine. 19;28(18):3112-7. (2010)
	239	GQ890718.1	Thailand	Jongwutiwes S, Putaporntip C, Hughes AL. Bottleneck effects on vaccine-candidate antigen diversity of malaria parasites in Thailand. Vaccine. 19;28(18):3112-7. (2010)
	240	GQ890719.1	Thailand	Jongwutiwes S, Putaporntip C, Hughes AL. Bottleneck effects on vaccine-candidate antigen diversity of malaria parasites in Thailand. Vaccine. 19;28(18):3112-7. (2010)
	241	GQ890720.1	Thailand	Jongwutiwes S, Putaporntip C, Hughes AL. Bottleneck effects on vaccine-candidate antigen diversity of malaria parasites in Thailand. Vaccine. 19;28(18):3112-7. (2010)
	242	GQ890721.1	Thailand	Jongwutiwes S, Putaporntip C, Hughes AL. Bottleneck effects on vaccine-candidate antigen diversity of malaria parasites in Thailand. Vaccine. 19;28(18):3112-7. (2010)
	243	GQ890722.1	Thailand	Jongwutiwes S, Putaporntip C, Hughes AL. Bottleneck effects on vaccine-candidate antigen diversity of malaria parasites in Thailand. Vaccine. 19;28(18):3112-7. (2010)
	244	GQ890723.1	Thailand	Jongwutiwes S, Putaporntip C, Hughes AL. Bottleneck effects on vaccine-candidate antigen diversity of malaria parasites in Thailand. Vaccine. 19;28(18):3112-7. (2010)
	245	GQ890724.1	Thailand	Jongwutiwes S, Putaporntip C, Hughes AL. Bottleneck effects on vaccine-candidate antigen diversity of malaria parasites in Thailand. Vaccine. 19;28(18):3112-7. (2010)
	246	GQ890725.1	Thailand	Jongwutiwes S, Putaporntip C, Hughes AL. Bottleneck effects on vaccine-candidate antigen diversity of malaria parasites in Thailand. Vaccine. 19;28(18):3112-7. (2010)
	247	GQ890726.1	Thailand	Jongwutiwes S, Putaporntip C, Hughes AL. Bottleneck effects on vaccine-candidate antigen diversity of malaria parasites in Thailand. Vaccine. 19;28(18):3112-7. (2010)
	248	GQ890727.1	Thailand	Jongwutiwes S, Putaporntip C, Hughes AL. Bottleneck effects on vaccine-candidate antigen diversity of malaria parasites in Thailand. Vaccine. 19;28(18):3112-7. (2010)
	249	GQ890728.1	Thailand	Jongwutiwes S, Putaporntip C, Hughes AL. Bottleneck effects on vaccine-candidate antigen diversity of malaria parasites in Thailand. Vaccine. 19;28(18):3112-7. (2010)
	250	GQ890729.1	Thailand	Jongwutiwes S, Putaporntip C, Hughes AL. Bottleneck effects on vaccine-candidate antigen diversity of malaria parasites in Thailand. Vaccine. 19;28(18):3112-7. (2010)
	251	GQ890730.1	Thailand	Jongwutiwes S, Putaporntip C, Hughes AL. Bottleneck effects on vaccine-candidate antigen diversity of malaria parasites in Thailand. Vaccine. 19;28(18):3112-7. (2010)
	252	GQ890731.1	Thailand	Jongwutiwes S, Putaporntip C, Hughes AL. Bottleneck effects on vaccine-candidate antigen diversity of malaria parasites in Thailand. Vaccine. 19;28(18):3112-7. (2010)
	253	GQ890732.1	Thailand	Jongwutiwes S, Putaporntip C, Hughes AL. Bottleneck effects on vaccine-candidate antigen diversity of malaria parasites in Thailand. Vaccine. 19;28(18):3112-7. (2010)
	254	GQ890733.1	Thailand	Jongwutiwes S, Putaporntip C, Hughes AL. Bottleneck effects on vaccine-candidate antigen diversity of malaria parasites in Thailand. Vaccine. 19;28(18):3112-7. (2010)
	255	GQ890734.1	Thailand	Jongwutiwes S, Putaporntip C, Hughes AL. Bottleneck effects on vaccine-candidate antigen diversity of malaria parasites in Thailand. Vaccine. 19;28(18):3112-7. (2010)
	256	GQ890735.1	Thailand	Jongwutiwes S, Putaporntip C, Hughes AL. Bottleneck effects on vaccine-candidate antigen diversity of malaria parasites in Thailand. Vaccine. 19;28(18):3112-7. (2010)
	257	GQ890736.1	Thailand	Jongwutiwes S, Putaporntip C, Hughes AL. Bottleneck effects on vaccine-candidate antigen diversity of malaria parasites in Thailand. Vaccine. 19;28(18):3112-7. (2010)
	258	GQ890737.1	Thailand	Jongwutiwes S, Putaporntip C, Hughes AL. Bottleneck effects on vaccine-candidate antigen diversity of malaria parasites in Thailand. Vaccine. 19;28(18):3112-7. (2010)
	259	GQ890738.1	Thailand	Jongwutiwes S, Putaporntip C, Hughes AL. Bottleneck effects on vaccine-candidate antigen diversity of malaria parasites in Thailand. Vaccine. 19;28(18):3112-7. (2010)
	260	GQ890739.1	Thailand	Jongwutiwes S, Putaporntip C, Hughes AL. Bottleneck effects on vaccine-candidate antigen diversity of malaria parasites in Thailand. Vaccine. 19;28(18):3112-7. (2010)
	261	GQ890740.1	Thailand	Jongwutiwes S, Putaporntip C, Hughes AL. Bottleneck effects on vaccine-candidate antigen diversity of malaria parasites in Thailand. Vaccine. 19;28(18):3112-7. (2010)
	262	GQ890741.1	Thailand	Jongwutiwes S, Putaporntip C, Hughes AL. Bottleneck effects on vaccine-candidate antigen diversity of malaria parasites in Thailand. Vaccine. 19;28(18):3112-7. (2010)
	263	GQ890742.1	Thailand	Jongwutiwes S, Putaporntip C, Hughes AL. Bottleneck effects on vaccine-candidate antigen diversity of malaria parasites in Thailand. Vaccine. 19;28(18):3112-7. (2010)
	264	GQ890743.1	Thailand	Jongwutiwes S, Putaporntip C, Hughes AL. Bottleneck effects on vaccine-candidate antigen diversity of malaria parasites in Thailand. Vaccine. 19;28(18):3112-7. (2010)
	265	GQ890744.1	Thailand	Jongwutiwes S, Putaporntip C, Hughes AL. Bottleneck effects on vaccine-candidate antigen diversity of malaria parasites in Thailand. Vaccine. 19;28(18):3112-7. (2010)
	266	GQ890745.1	Thailand	Jongwutiwes S, Putaporntip C, Hughes AL. Bottleneck effects on vaccine-candidate antigen diversity of malaria parasites in Thailand. Vaccine. 19;28(18):3112-7. (2010)
	267	GQ890746.1	Thailand	Jongwutiwes S, Putaporntip C, Hughes AL. Bottleneck effects on vaccine-candidate antigen diversity of malaria parasites in Thailand. Vaccine. 19;28(18):3112-7. (2010)
	268	GQ890747.1	Thailand	Jongwutiwes S, Putaporntip C, Hughes AL. Bottleneck effects on vaccine-candidate antigen diversity of malaria parasites in Thailand. Vaccine. 19;28(18):3112-7. (2010)
	269	GQ890748.1	Thailand	Jongwutiwes S, Putaporntip C, Hughes AL. Bottleneck effects on vaccine-candidate antigen diversity of malaria parasites in Thailand. Vaccine. 19;28(18):3112-7. (2010)
	270	GQ890749.1	Thailand	Jongwutiwes S, Putaporntip C, Hughes AL. Bottleneck effects on vaccine-candidate antigen diversity of malaria parasites in Thailand. Vaccine. 19;28(18):3112-7. (2010)
	271	GQ890750.1	Thailand	Jongwutiwes S, Putaporntip C, Hughes AL. Bottleneck effects on vaccine-candidate antigen diversity of malaria parasites in Thailand. Vaccine. 19;28(18):3112-7. (2010)
	272	GQ890751.1	Thailand	Jongwutiwes S, Putaporntip C, Hughes AL. Bottleneck effects on vaccine-candidate antigen diversity of malaria parasites in Thailand. Vaccine. 19;28(18):3112-7. (2010)
	273	GQ890752.1	Thailand	Jongwutiwes S, Putaporntip C, Hughes AL. Bottleneck effects on vaccine-candidate antigen diversity of malaria parasites in Thailand. Vaccine. 19;28(18):3112-7. (2010)
	274	GQ890753.1	Thailand	Jongwutiwes S, Putaporntip C, Hughes AL. Bottleneck effects on vaccine-candidate antigen diversity of malaria parasites in Thailand. Vaccine. 19;28(18):3112-7. (2010)
	275	GQ890754.1	Thailand	Jongwutiwes S, Putaporntip C, Hughes AL. Bottleneck effects on vaccine-candidate antigen diversity of malaria parasites in Thailand. Vaccine. 19;28(18):3112-7. (2010)
	276	GQ890755.1	Thailand	Jongwutiwes S, Putaporntip C, Hughes AL. Bottleneck effects on vaccine-candidate antigen diversity of malaria parasites in Thailand. Vaccine. 19;28(18):3112-7. (2010)
	277	GQ890756.1	Thailand	Jongwutiwes S, Putaporntip C, Hughes AL. Bottleneck effects on vaccine-candidate antigen diversity of malaria parasites in Thailand. Vaccine. 19;28(18):3112-7. (2010)
	278	GQ890757.1	Thailand	Jongwutiwes S, Putaporntip C, Hughes AL. Bottleneck effects on vaccine-candidate antigen diversity of malaria parasites in Thailand. Vaccine. 19;28(18):3112-7. (2010)
	279	GQ890758.1	Thailand	Jongwutiwes S, Putaporntip C, Hughes AL. Bottleneck effects on vaccine-candidate antigen diversity of malaria parasites in Thailand. Vaccine. 19;28(18):3112-7. (2010)
	280	GQ890759.1	Thailand	Jongwutiwes S, Putaporntip C, Hughes AL. Bottleneck effects on vaccine-candidate antigen diversity of malaria parasites in Thailand. Vaccine. 19;28(18):3112-7. (2010)
	281	GQ890760.1	Thailand	Jongwutiwes S, Putaporntip C, Hughes AL. Bottleneck effects on vaccine-candidate antigen diversity of malaria parasites in Thailand. Vaccine. 19;28(18):3112-7. (2010)
	282	GQ890761.1	Thailand	Jongwutiwes S, Putaporntip C, Hughes AL. Bottleneck effects on vaccine-candidate antigen diversity of malaria parasites in Thailand. Vaccine. 19;28(18):3112-7. (2010)
	283	GQ890762.1	Thailand	Jongwutiwes S, Putaporntip C, Hughes AL. Bottleneck effects on vaccine-candidate antigen diversity of malaria parasites in Thailand. Vaccine. 19;28(18):3112-7. (2010)
	284	GQ890763.1	Thailand	Jongwutiwes S, Putaporntip C, Hughes AL. Bottleneck effects on vaccine-candidate antigen diversity of malaria parasites in Thailand. Vaccine. 19;28(18):3112-7. (2010)
	285	GQ890764.1	Thailand	Jongwutiwes S, Putaporntip C, Hughes AL. Bottleneck effects on vaccine-candidate antigen diversity of malaria parasites in Thailand. Vaccine. 19;28(18):3112-7. (2010)
	286	GQ890765.1	Thailand	Jongwutiwes S, Putaporntip C, Hughes AL. Bottleneck effects on vaccine-candidate antigen diversity of malaria parasites in Thailand. Vaccine. 19;28(18):3112-7. (2010)
	287	GQ890766.1	Thailand	Jongwutiwes S, Putaporntip C, Hughes AL. Bottleneck effects on vaccine-candidate antigen diversity of malaria parasites in Thailand. Vaccine. 19;28(18):3112-7. (2010)
	288	GQ890767.1	Thailand	Jongwutiwes S, Putaporntip C, Hughes AL. Bottleneck effects on vaccine-candidate antigen diversity of malaria parasites in Thailand. Vaccine. 19;28(18):3112-7. (2010)
	289	GQ890768.1	Thailand	Jongwutiwes S, Putaporntip C, Hughes AL. Bottleneck effects on vaccine-candidate antigen diversity of malaria parasites in Thailand. Vaccine. 19;28(18):3112-7. (2010)
	290	GQ890769.1	Thailand	Jongwutiwes S, Putaporntip C, Hughes AL. Bottleneck effects on vaccine-candidate antigen diversity of malaria parasites in Thailand. Vaccine. 19;28(18):3112-7. (2010)
	291	GQ890770.1	Thailand	Jongwutiwes S, Putaporntip C, Hughes AL. Bottleneck effects on vaccine-candidate antigen diversity of malaria parasites in Thailand. Vaccine. 19;28(18):3112-7. (2010)
	292	GQ890771.1	Thailand	Jongwutiwes S, Putaporntip C, Hughes AL. Bottleneck effects on vaccine-candidate antigen diversity of malaria parasites in Thailand. Vaccine. 19;28(18):3112-7. (2010)
	293	GQ890772.1	Thailand	Jongwutiwes S, Putaporntip C, Hughes AL. Bottleneck effects on vaccine-candidate antigen diversity of malaria parasites in Thailand. Vaccine. 19;28(18):3112-7. (2010)
	294	GQ890773.1	Thailand	Jongwutiwes S, Putaporntip C, Hughes AL. Bottleneck effects on vaccine-candidate antigen diversity of malaria parasites in Thailand. Vaccine. 19;28(18):3112-7. (2010)
	295	GQ890774.1	Thailand	Jongwutiwes S, Putaporntip C, Hughes AL. Bottleneck effects on vaccine-candidate antigen diversity of malaria parasites in Thailand. Vaccine. 19;28(18):3112-7. (2010)
	296	GQ890775.1	Thailand	Jongwutiwes S, Putaporntip C, Hughes AL. Bottleneck effects on vaccine-candidate antigen diversity of malaria parasites in Thailand. Vaccine. 19;28(18):3112-7. (2010)
	297	GQ890776.1	Thailand	Jongwutiwes S, Putaporntip C, Hughes AL. Bottleneck effects on vaccine-candidate antigen diversity of malaria parasites in Thailand. Vaccine. 19;28(18):3112-7. (2010)
	298	GQ890777.1	Thailand	Jongwutiwes S, Putaporntip C, Hughes AL. Bottleneck effects on vaccine-candidate antigen diversity of malaria parasites in Thailand. Vaccine. 19;28(18):3112-7. (2010)
	299	GQ890778.1	Thailand	Jongwutiwes S, Putaporntip C, Hughes AL. Bottleneck effects on vaccine-candidate antigen diversity of malaria parasites in Thailand. Vaccine. 19;28(18):3112-7. (2010)
	300	GQ890779.1	Thailand	Jongwutiwes S, Putaporntip C, Hughes AL. Bottleneck effects on vaccine-candidate antigen diversity of malaria parasites in Thailand. Vaccine. 19;28(18):3112-7. (2010)
	301	GQ890780.1	Thailand	Jongwutiwes S, Putaporntip C, Hughes AL. Bottleneck effects on vaccine-candidate antigen diversity of malaria parasites in Thailand. Vaccine. 19;28(18):3112-7. (2010)
	302	GQ890781.1	Thailand	Jongwutiwes S, Putaporntip C, Hughes AL. Bottleneck effects on vaccine-candidate antigen diversity of malaria parasites in Thailand. Vaccine. 19;28(18):3112-7. (2010)
	303	GQ890782.1	Thailand	Jongwutiwes S, Putaporntip C, Hughes AL. Bottleneck effects on vaccine-candidate antigen diversity of malaria parasites in Thailand. Vaccine. 19;28(18):3112-7. (2010)
	304	GQ890783.1	Thailand	Jongwutiwes S, Putaporntip C, Hughes AL. Bottleneck effects on vaccine-candidate antigen diversity of malaria parasites in Thailand. Vaccine. 19;28(18):3112-7. (2010)
	305	GQ890784.1	Thailand	Jongwutiwes S, Putaporntip C, Hughes AL. Bottleneck effects on vaccine-candidate antigen diversity of malaria parasites in Thailand. Vaccine. 19;28(18):3112-7. (2010)
	306	GQ890785.1	Thailand	Jongwutiwes S, Putaporntip C, Hughes AL. Bottleneck effects on vaccine-candidate antigen diversity of malaria parasites in Thailand. Vaccine. 19;28(18):3112-7. (2010)
	307	GQ890786.1	Thailand	Jongwutiwes S, Putaporntip C, Hughes AL. Bottleneck effects on vaccine-candidate antigen diversity of malaria parasites in Thailand. Vaccine. 19;28(18):3112-7. (2010)
	308	GQ890787.1	Thailand	Jongwutiwes S, Putaporntip C, Hughes AL. Bottleneck effects on vaccine-candidate antigen diversity of malaria parasites in Thailand. Vaccine. 19;28(18):3112-7. (2010)
	309	GQ890788.1	Thailand	Jongwutiwes S, Putaporntip C, Hughes AL. Bottleneck effects on vaccine-candidate antigen diversity of malaria parasites in Thailand. Vaccine. 19;28(18):3112-7. (2010)
	310	GQ890789.1	Thailand	Jongwutiwes S, Putaporntip C, Hughes AL. Bottleneck effects on vaccine-candidate antigen diversity of malaria parasites in Thailand. Vaccine. 19;28(18):3112-7. (2010)
	311	M19752.1	Thailand	del Portillo HA, Nussenzweig RS, Enea V. Circumsporozoite gene of a Plasmodium falciparum strain from Thailand. Mol Biochem Parasitol. 24(3):289-94. (1987)
	312	M83149.1	Thailand	Jongwutiwes S, Tanabe K, Hughes MK, Kanbara H, Hughes AL. Allelic variation in the circumsporozoite protein of Plasmodium falciparum from Thai field isolates. Am J Trop Med Hyg ;51(5):659-68 (1994).
	313	M83150.1	Thailand	Jongwutiwes S, Tanabe K, Hughes MK, Kanbara H, Hughes AL. Allelic variation in the circumsporozoite protein of Plasmodium falciparum from Thai field isolates. Am J Trop Med Hyg ;51(5):659-68 (1994).
	314	M83151.1	Thailand	Jongwutiwes S, Tanabe K, Hughes MK, Kanbara H, Hughes AL. Allelic variation in the circumsporozoite protein of Plasmodium falciparum from Thai field isolates. Am J Trop Med Hyg ;51(5):659-68 (1994).
	315	M83152.1	Thailand	Jongwutiwes S, Tanabe K, Hughes MK, Kanbara H, Hughes AL. Allelic variation in the circumsporozoite protein of Plasmodium falciparum from Thai field isolates. Am J Trop Med Hyg ;51(5):659-68 (1994).
	316	M83153.1	Thailand	Jongwutiwes S, Tanabe K, Hughes MK, Kanbara H, Hughes AL. Allelic variation in the circumsporozoite protein of Plasmodium falciparum from Thai field isolates. Am J Trop Med Hyg ;51(5):659-68 (1994).
	317	M83154.1	Thailand	Jongwutiwes S, Tanabe K, Hughes MK, Kanbara H, Hughes AL. Allelic variation in the circumsporozoite protein of Plasmodium falciparum from Thai field isolates. Am J Trop Med Hyg ;51(5):659-68 (1994).
	318	M83155.1	Thailand	Jongwutiwes S, Tanabe K, Hughes MK, Kanbara H, Hughes AL. Allelic variation in the circumsporozoite protein of Plasmodium falciparum from Thai field isolates. Am J Trop Med Hyg ;51(5):659-68 (1994).
	319	M83156.1	Thailand	Jongwutiwes S, Tanabe K, Hughes MK, Kanbara H, Hughes AL. Allelic variation in the circumsporozoite protein of Plasmodium falciparum from Thai field isolates. Am J Trop Med Hyg ;51(5):659-68 (1994).
	320	M83157.1	Thailand	Jongwutiwes S, Tanabe K, Hughes MK, Kanbara H, Hughes AL. Allelic variation in the circumsporozoite protein of Plasmodium falciparum from Thai field isolates. Am J Trop Med Hyg ;51(5):659-68 (1994).
	321	M83158.1	Thailand	Jongwutiwes S, Tanabe K, Hughes MK, Kanbara H, Hughes AL. Allelic variation in the circumsporozoite protein of Plasmodium falciparum from Thai field isolates. Am J Trop Med Hyg ;51(5):659-68 (1994).
	322	M83159.1	Thailand	Jongwutiwes S, Tanabe K, Hughes MK, Kanbara H, Hughes AL. Allelic variation in the circumsporozoite protein of Plasmodium falciparum from Thai field isolates. Am J Trop Med Hyg ;51(5):659-68 (1994).
	323	M83160.1	Thailand	Jongwutiwes S, Tanabe K, Hughes MK, Kanbara H, Hughes AL. Allelic variation in the circumsporozoite protein of Plasmodium falciparum from Thai field isolates. Am J Trop Med Hyg ;51(5):659-68 (1994).
	324	M83161.1	Thailand	Jongwutiwes S, Tanabe K, Hughes MK, Kanbara H, Hughes AL. Allelic variation in the circumsporozoite protein of Plasmodium falciparum from Thai field isolates. Am J Trop Med Hyg ;51(5):659-68 (1994).
	325	M83162.1	Thailand	Jongwutiwes S, Tanabe K, Hughes MK, Kanbara H, Hughes AL. Allelic variation in the circumsporozoite protein of Plasmodium falciparum from Thai field isolates. Am J Trop Med Hyg ;51(5):659-68 (1994).
	326	M83163.1	Thailand	Jongwutiwes S, Tanabe K, Hughes MK, Kanbara H, Hughes AL. Allelic variation in the circumsporozoite protein of Plasmodium falciparum from Thai field isolates. Am J Trop Med Hyg ;51(5):659-68 (1994).
	327	M83164.1	Thailand	Jongwutiwes S, Tanabe K, Hughes MK, Kanbara H, Hughes AL. Allelic variation in the circumsporozoite protein of Plasmodium falciparum from Thai field isolates. Am J Trop Med Hyg ;51(5):659-68 (1994).
	328	M83165.1	Thailand	Jongwutiwes S, Tanabe K, Hughes MK, Kanbara H, Hughes AL. Allelic variation in the circumsporozoite protein of Plasmodium falciparum from Thai field isolates. Am J Trop Med Hyg ;51(5):659-68 (1994).
	329	M83166.1	Thailand	Jongwutiwes S, Tanabe K, Hughes MK, Kanbara H, Hughes AL. Allelic variation in the circumsporozoite protein of Plasmodium falciparum from Thai field isolates. Am J Trop Med Hyg ;51(5):659-68 (1994).
	330	M83167.1	Thailand	Jongwutiwes S, Tanabe K, Hughes MK, Kanbara H, Hughes AL. Allelic variation in the circumsporozoite protein of Plasmodium falciparum from Thai field isolates. Am J Trop Med Hyg ;51(5):659-68 (1994).
	331	M83168.1	Thailand	Jongwutiwes S, Tanabe K, Hughes MK, Kanbara H, Hughes AL. Allelic variation in the circumsporozoite protein of Plasmodium falciparum from Thai field isolates. Am J Trop Med Hyg ;51(5):659-68 (1994).
	332	M83169.1	Thailand	Jongwutiwes S, Tanabe K, Hughes MK, Kanbara H, Hughes AL. Allelic variation in the circumsporozoite protein of Plasmodium falciparum from Thai field isolates. Am J Trop Med Hyg ;51(5):659-68 (1994).
	333	M83170.1	Thailand	Jongwutiwes S, Tanabe K, Hughes MK, Kanbara H, Hughes AL. Allelic variation in the circumsporozoite protein of Plasmodium falciparum from Thai field isolates. Am J Trop Med Hyg ;51(5):659-68 (1994).
	334	M83171.1	Thailand	Jongwutiwes S, Tanabe K, Hughes MK, Kanbara H, Hughes AL. Allelic variation in the circumsporozoite protein of Plasmodium falciparum from Thai field isolates. Am J Trop Med Hyg ;51(5):659-68 (1994).
	335	M83173.1	Thailand	Jongwutiwes S, Tanabe K, Hughes MK, Kanbara H, Hughes AL. Allelic variation in the circumsporozoite protein of Plasmodium falciparum from Thai field isolates. Am J Trop Med Hyg ;51(5):659-68 (1994).
	336	M83174.1	Thailand	Jongwutiwes S, Tanabe K, Hughes MK, Kanbara H, Hughes AL. Allelic variation in the circumsporozoite protein of Plasmodium falciparum from Thai field isolates. Am J Trop Med Hyg ;51(5):659-68 (1994).
	1	DQ193573.1	Vietnam	Jalloh A, van Thien H, Ferreira MU, Ohashi J, Matsuoka H, Kanbe T, Kikuchi A, Kawamoto F. Sequence variation in the T-cell epitopes of the Plasmodium falciparum circumsporozoite protein among field isolates is temporally stable: a 5-year longitudinal study in southern Vietnam. J Clin Microbiol 44(4):1229-35 (2006)
	2	DQ193574.1	Vietnam	Jalloh A, van Thien H, Ferreira MU, Ohashi J, Matsuoka H, Kanbe T, Kikuchi A, Kawamoto F. Sequence variation in the T-cell epitopes of the Plasmodium falciparum circumsporozoite protein among field isolates is temporally stable: a 5-year longitudinal study in southern Vietnam. J Clin Microbiol 44(4):1229-35 (2006)
	3	DQ193575.1	Vietnam	Jalloh A, van Thien H, Ferreira MU, Ohashi J, Matsuoka H, Kanbe T, Kikuchi A, Kawamoto F. Sequence variation in the T-cell epitopes of the Plasmodium falciparum circumsporozoite protein among field isolates is temporally stable: a 5-year longitudinal study in southern Vietnam. J Clin Microbiol 44(4):1229-35 (2006)
	4	DQ193576.1	Vietnam	Jalloh A, van Thien H, Ferreira MU, Ohashi J, Matsuoka H, Kanbe T, Kikuchi A, Kawamoto F. Sequence variation in the T-cell epitopes of the Plasmodium falciparum circumsporozoite protein among field isolates is temporally stable: a 5-year longitudinal study in southern Vietnam. J Clin Microbiol 44(4):1229-35 (2006)
	5	DQ193577.1	Vietnam	Jalloh A, van Thien H, Ferreira MU, Ohashi J, Matsuoka H, Kanbe T, Kikuchi A, Kawamoto F. Sequence variation in the T-cell epitopes of the Plasmodium falciparum circumsporozoite protein among field isolates is temporally stable: a 5-year longitudinal study in southern Vietnam. J Clin Microbiol 44(4):1229-35 (2006)
	6	DQ193578.1	Vietnam	Jalloh A, van Thien H, Ferreira MU, Ohashi J, Matsuoka H, Kanbe T, Kikuchi A, Kawamoto F. Sequence variation in the T-cell epitopes of the Plasmodium falciparum circumsporozoite protein among field isolates is temporally stable: a 5-year longitudinal study in southern Vietnam. J Clin Microbiol 44(4):1229-35 (2006)
	7	DQ193579.1	Vietnam	Jalloh A, van Thien H, Ferreira MU, Ohashi J, Matsuoka H, Kanbe T, Kikuchi A, Kawamoto F. Sequence variation in the T-cell epitopes of the Plasmodium falciparum circumsporozoite protein among field isolates is temporally stable: a 5-year longitudinal study in southern Vietnam. J Clin Microbiol 44(4):1229-35 (2006)
	8	DQ193580.1	Vietnam	Jalloh A, van Thien H, Ferreira MU, Ohashi J, Matsuoka H, Kanbe T, Kikuchi A, Kawamoto F. Sequence variation in the T-cell epitopes of the Plasmodium falciparum circumsporozoite protein among field isolates is temporally stable: a 5-year longitudinal study in southern Vietnam. J Clin Microbiol 44(4):1229-35 (2006)
	9	DQ193581.1	Vietnam	Jalloh A, van Thien H, Ferreira MU, Ohashi J, Matsuoka H, Kanbe T, Kikuchi A, Kawamoto F. Sequence variation in the T-cell epitopes of the Plasmodium falciparum circumsporozoite protein among field isolates is temporally stable: a 5-year longitudinal study in southern Vietnam. J Clin Microbiol 44(4):1229-35 (2006)
	10	DQ193582.1	Vietnam	Jalloh A, van Thien H, Ferreira MU, Ohashi J, Matsuoka H, Kanbe T, Kikuchi A, Kawamoto F. Sequence variation in the T-cell epitopes of the Plasmodium falciparum circumsporozoite protein among field isolates is temporally stable: a 5-year longitudinal study in southern Vietnam. J Clin Microbiol 44(4):1229-35 (2006)
	11	DQ193583.1	Vietnam	Jalloh A, van Thien H, Ferreira MU, Ohashi J, Matsuoka H, Kanbe T, Kikuchi A, Kawamoto F. Sequence variation in the T-cell epitopes of the Plasmodium falciparum circumsporozoite protein among field isolates is temporally stable: a 5-year longitudinal study in southern Vietnam. J Clin Microbiol 44(4):1229-35 (2006)
	12	DQ193584.1	Vietnam	Jalloh A, van Thien H, Ferreira MU, Ohashi J, Matsuoka H, Kanbe T, Kikuchi A, Kawamoto F. Sequence variation in the T-cell epitopes of the Plasmodium falciparum circumsporozoite protein among field isolates is temporally stable: a 5-year longitudinal study in southern Vietnam. J Clin Microbiol 44(4):1229-35 (2006)
	13	DQ193585.1	Vietnam	Jalloh A, van Thien H, Ferreira MU, Ohashi J, Matsuoka H, Kanbe T, Kikuchi A, Kawamoto F. Sequence variation in the T-cell epitopes of the Plasmodium falciparum circumsporozoite protein among field isolates is temporally stable: a 5-year longitudinal study in southern Vietnam. J Clin Microbiol 44(4):1229-35 (2006)
	14	DQ193586.1	Vietnam	Jalloh A, van Thien H, Ferreira MU, Ohashi J, Matsuoka H, Kanbe T, Kikuchi A, Kawamoto F. Sequence variation in the T-cell epitopes of the Plasmodium falciparum circumsporozoite protein among field isolates is temporally stable: a 5-year longitudinal study in southern Vietnam. J Clin Microbiol 44(4):1229-35 (2006)
	15	DQ193587.1	Vietnam	Jalloh A, van Thien H, Ferreira MU, Ohashi J, Matsuoka H, Kanbe T, Kikuchi A, Kawamoto F. Sequence variation in the T-cell epitopes of the Plasmodium falciparum circumsporozoite protein among field isolates is temporally stable: a 5-year longitudinal study in southern Vietnam. J Clin Microbiol 44(4):1229-35 (2006)
	16	DQ193588.1	Vietnam	Jalloh A, van Thien H, Ferreira MU, Ohashi J, Matsuoka H, Kanbe T, Kikuchi A, Kawamoto F. Sequence variation in the T-cell epitopes of the Plasmodium falciparum circumsporozoite protein among field isolates is temporally stable: a 5-year longitudinal study in southern Vietnam. J Clin Microbiol 44(4):1229-35 (2006)
	17	DQ193589.1	Vietnam	Jalloh A, van Thien H, Ferreira MU, Ohashi J, Matsuoka H, Kanbe T, Kikuchi A, Kawamoto F. Sequence variation in the T-cell epitopes of the Plasmodium falciparum circumsporozoite protein among field isolates is temporally stable: a 5-year longitudinal study in southern Vietnam. J Clin Microbiol 44(4):1229-35 (2006)
	18	DQ193590.1	Vietnam	Jalloh A, van Thien H, Ferreira MU, Ohashi J, Matsuoka H, Kanbe T, Kikuchi A, Kawamoto F. Sequence variation in the T-cell epitopes of the Plasmodium falciparum circumsporozoite protein among field isolates is temporally stable: a 5-year longitudinal study in southern Vietnam. J Clin Microbiol 44(4):1229-35 (2006)
	19	DQ193591.1	Vietnam	Jalloh A, van Thien H, Ferreira MU, Ohashi J, Matsuoka H, Kanbe T, Kikuchi A, Kawamoto F. Sequence variation in the T-cell epitopes of the Plasmodium falciparum circumsporozoite protein among field isolates is temporally stable: a 5-year longitudinal study in southern Vietnam. J Clin Microbiol 44(4):1229-35 (2006)
	20	DQ193592.1	Vietnam	Jalloh A, van Thien H, Ferreira MU, Ohashi J, Matsuoka H, Kanbe T, Kikuchi A, Kawamoto F. Sequence variation in the T-cell epitopes of the Plasmodium falciparum circumsporozoite protein among field isolates is temporally stable: a 5-year longitudinal study in southern Vietnam. J Clin Microbiol 44(4):1229-35 (2006)
	1	DQ193593.1	Indonesia	Jalloh A, van Thien H, Ferreira MU, Ohashi J, Matsuoka H, Kanbe T, Kikuchi A, Kawamoto F. Sequence variation in the T-cell epitopes of the Plasmodium falciparum circumsporozoite protein among field isolates is temporally stable: a 5-year longitudinal study in southern Vietnam. J Clin Microbiol 44(4):1229-35 (2006)
	2	DQ193594.1	Indonesia	Jalloh A, van Thien H, Ferreira MU, Ohashi J, Matsuoka H, Kanbe T, Kikuchi A, Kawamoto F. Sequence variation in the T-cell epitopes of the Plasmodium falciparum circumsporozoite protein among field isolates is temporally stable: a 5-year longitudinal study in southern Vietnam. J Clin Microbiol 44(4):1229-35 (2006)
	1	AB116602.1	Vanuatu	Tanabe K, Sakihama N, Kaneko A. Stable SNPs in malaria antigen genes in isolated populations. Science 23;303(5657):493. 2004
	2	AB116603.1	Vanuatu	Tanabe K, Sakihama N, Kaneko A. Stable SNPs in malaria antigen genes in isolated populations. Science 23;303(5657):493. 2004
	3	AB116604.1	Vanuatu	Tanabe K, Sakihama N, Kaneko A. Stable SNPs in malaria antigen genes in isolated populations. Science 23;303(5657):493. 2004
	4	AB116605.1	Vanuatu	Tanabe K, Sakihama N, Kaneko A. Stable SNPs in malaria antigen genes in isolated populations. Science 23;303(5657):493. 2004
	5	AB116606.1	Vanuatu	Tanabe K, Sakihama N, Kaneko A. Stable SNPs in malaria antigen genes in isolated populations. Science 23;303(5657):493. 2004
	6	AB116607.1	Vanuatu	Tanabe K, Sakihama N, Kaneko A. Stable SNPs in malaria antigen genes in isolated populations. Science 23;303(5657):493. 2004
	1	AF540458.1	Venezuela	Escalante AA, Grebert HM, Isea R, Goldman IF, Basco L, Magris M, Biswas S, Kariuki S and Lal AA. A study of genetic diversity in the gene encoding the circumsporozoite protein (CSP) of Plasmodium falciparum from different transmission areas--XVI. Asembo Bay Cohort Project. Mol Biochem Parasitol125(1-2):83-90 (2002).
	2	AF540459.1	Venezuela	Escalante AA, Grebert HM, Isea R, Goldman IF, Basco L, Magris M, Biswas S, Kariuki S and Lal AA. A study of genetic diversity in the gene encoding the circumsporozoite protein (CSP) of Plasmodium falciparum from different transmission areas--XVI. Asembo Bay Cohort Project. Mol Biochem Parasitol125(1-2):83-90 (2002).
	3	AF540460.1	Venezuela	Escalante AA, Grebert HM, Isea R, Goldman IF, Basco L, Magris M, Biswas S, Kariuki S and Lal AA. A study of genetic diversity in the gene encoding the circumsporozoite protein (CSP) of Plasmodium falciparum from different transmission areas--XVI. Asembo Bay Cohort Project. Mol Biochem Parasitol125(1-2):83-90 (2002).
	4	AF540464.1	Venezuela	Escalante AA, Grebert HM, Isea R, Goldman IF, Basco L, Magris M, Biswas S, Kariuki S and Lal AA. A study of genetic diversity in the gene encoding the circumsporozoite protein (CSP) of Plasmodium falciparum from different transmission areas--XVI. Asembo Bay Cohort Project. Mol Biochem Parasitol125(1-2):83-90 (2002).
	5	AF540466.1	Venezuela	Escalante AA, Grebert HM, Isea R, Goldman IF, Basco L, Magris M, Biswas S, Kariuki S and Lal AA. A study of genetic diversity in the gene encoding the circumsporozoite protein (CSP) of Plasmodium falciparum from different transmission areas--XVI. Asembo Bay Cohort Project. Mol Biochem Parasitol125(1-2):83-90 (2002).
	6	AF540469.1	Venezuela	Escalante AA, Grebert HM, Isea R, Goldman IF, Basco L, Magris M, Biswas S, Kariuki S and Lal AA. A study of genetic diversity in the gene encoding the circumsporozoite protein (CSP) of Plasmodium falciparum from different transmission areas--XVI. Asembo Bay Cohort Project. Mol Biochem Parasitol125(1-2):83-90 (2002).
	7	AF540470.1	Venezuela	Escalante AA, Grebert HM, Isea R, Goldman IF, Basco L, Magris M, Biswas S, Kariuki S and Lal AA. A study of genetic diversity in the gene encoding the circumsporozoite protein (CSP) of Plasmodium falciparum from different transmission areas--XVI. Asembo Bay Cohort Project. Mol Biochem Parasitol125(1-2):83-90 (2002).
	8	AF540471.1	Venezuela	Escalante AA, Grebert HM, Isea R, Goldman IF, Basco L, Magris M, Biswas S, Kariuki S and Lal AA. A study of genetic diversity in the gene encoding the circumsporozoite protein (CSP) of Plasmodium falciparum from different transmission areas--XVI. Asembo Bay Cohort Project. Mol Biochem Parasitol125(1-2):83-90 (2002).
	9	AF540478.1	Venezuela	Escalante AA, Grebert HM, Isea R, Goldman IF, Basco L, Magris M, Biswas S, Kariuki S and Lal AA. A study of genetic diversity in the gene encoding the circumsporozoite protein (CSP) of Plasmodium falciparum from different transmission areas--XVI. Asembo Bay Cohort Project. Mol Biochem Parasitol125(1-2):83-90 (2002).
	10	AF540479.1	Venezuela	Escalante AA, Grebert HM, Isea R, Goldman IF, Basco L, Magris M, Biswas S, Kariuki S and Lal AA. A study of genetic diversity in the gene encoding the circumsporozoite protein (CSP) of Plasmodium falciparum from different transmission areas--XVI. Asembo Bay Cohort Project. Mol Biochem Parasitol125(1-2):83-90 (2002).
	1	AJ269941.1	Brazil	de Stricker,K., Vuust,J., Jepsen,S., Oeuvray,C. and Theisen,M. Sequence variation in the non-repeat region of the Plasmodium falciparum glutamate rich protein (GLURP) from Brazil, Senegalese and Burmese field isolates and from laboratory strains. (Unpublished)
	2	AJ269971.1	Brazil	de Stricker,K., Vuust,J., Jepsen,S., Oeuvray,C. and Theisen,M. Sequence variation in the non-repeat region of the Plasmodium falciparum glutamate rich protein (GLURP) from Brazil, Senegalese and Burmese field isolates and from laboratory strains. (Unpublished)
	3	AJ269972.1	Brazil	de Stricker,K., Vuust,J., Jepsen,S., Oeuvray,C. and Theisen,M. Sequence variation in the non-repeat region of the Plasmodium falciparum glutamate rich protein (GLURP) from Brazil, Senegalese and Burmese field isolates and from laboratory strains. (Unpublished)
	4	AJ269973.1	Brazil	de Stricker,K., Vuust,J., Jepsen,S., Oeuvray,C. and Theisen,M. Sequence variation in the non-repeat region of the Plasmodium falciparum glutamate rich protein (GLURP) from Brazil, Senegalese and Burmese field isolates and from laboratory strains. (Unpublished)
	5	AJ269974.1	Brazil	de Stricker,K., Vuust,J., Jepsen,S., Oeuvray,C. and Theisen,M. Sequence variation in the non-repeat region of the Plasmodium falciparum glutamate rich protein (GLURP) from Brazil, Senegalese and Burmese field isolates and from laboratory strains. (Unpublished)
	6	AJ269975.1	Brazil	de Stricker,K., Vuust,J., Jepsen,S., Oeuvray,C. and Theisen,M. Sequence variation in the non-repeat region of the Plasmodium falciparum glutamate rich protein (GLURP) from Brazil, Senegalese and Burmese field isolates and from laboratory strains. (Unpublished)
	7	AJ269976.1	Brazil	de Stricker,K., Vuust,J., Jepsen,S., Oeuvray,C. and Theisen,M. Sequence variation in the non-repeat region of the Plasmodium falciparum glutamate rich protein (GLURP) from Brazil, Senegalese and Burmese field isolates and from laboratory strains. (Unpublished)
	8	AJ269977.1	Brazil	de Stricker,K., Vuust,J., Jepsen,S., Oeuvray,C. and Theisen,M. Sequence variation in the non-repeat region of the Plasmodium falciparum glutamate rich protein (GLURP) from Brazil, Senegalese and Burmese field isolates and from laboratory strains. (Unpublished)
	9	AJ269978.1	Brazil	de Stricker,K., Vuust,J., Jepsen,S., Oeuvray,C. and Theisen,M. Sequence variation in the non-repeat region of the Plasmodium falciparum glutamate rich protein (GLURP) from Brazil, Senegalese and Burmese field isolates and from laboratory strains. (Unpublished)
	10	K02194.1	Brazil	Dame JB, Williams JL et al. Structure of the gene encoding the immunodominant surface antigen on the sporozoite of the human malaria parasite Plasmodium falciparum. Science.10;225(4662):593-1984)
	1	AF540443.1	Asembo Bay	Escalante AA, Grebert HM, Isea R, Goldman IF, Basco L, Magris M, Biswas S, Kariuki S and Lal AA. A study of genetic diversity in the gene encoding the circumsporozoite protein (CSP) of Plasmodium falciparum from different transmission areas--XVI. Asembo Bay Cohort Project. Mol Biochem Parasitol125(1-2):83-90 (2002).
	2	AF540447.1	Asembo Bay	Escalante AA, Grebert HM, Isea R, Goldman IF, Basco L, Magris M, Biswas S, Kariuki S and Lal AA. A study of genetic diversity in the gene encoding the circumsporozoite protein (CSP) of Plasmodium falciparum from different transmission areas--XVI. Asembo Bay Cohort Project. Mol Biochem Parasitol125(1-2):83-90 (2002).
	3	AF540448.1	Asembo Bay	Escalante AA, Grebert HM, Isea R, Goldman IF, Basco L, Magris M, Biswas S, Kariuki S and Lal AA. A study of genetic diversity in the gene encoding the circumsporozoite protein (CSP) of Plasmodium falciparum from different transmission areas--XVI. Asembo Bay Cohort Project. Mol Biochem Parasitol125(1-2):83-90 (2002).
	4	AF540450.1	Asembo Bay	Escalante AA, Grebert HM, Isea R, Goldman IF, Basco L, Magris M, Biswas S, Kariuki S and Lal AA. A study of genetic diversity in the gene encoding the circumsporozoite protein (CSP) of Plasmodium falciparum from different transmission areas--XVI. Asembo Bay Cohort Project. Mol Biochem Parasitol125(1-2):83-90 (2002).
	5	AF540451.1	Asembo Bay	Escalante AA, Grebert HM, Isea R, Goldman IF, Basco L, Magris M, Biswas S, Kariuki S and Lal AA. A study of genetic diversity in the gene encoding the circumsporozoite protein (CSP) of Plasmodium falciparum from different transmission areas--XVI. Asembo Bay Cohort Project. Mol Biochem Parasitol125(1-2):83-90 (2002).
	6	AF540455.1	Asembo Bay	Escalante AA, Grebert HM, Isea R, Goldman IF, Basco L, Magris M, Biswas S, Kariuki S and Lal AA. A study of genetic diversity in the gene encoding the circumsporozoite protein (CSP) of Plasmodium falciparum from different transmission areas--XVI. Asembo Bay Cohort Project. Mol Biochem Parasitol125(1-2):83-90 (2002).
	7	AF540456.1	Asembo Bay	Escalante AA, Grebert HM, Isea R, Goldman IF, Basco L, Magris M, Biswas S, Kariuki S and Lal AA. A study of genetic diversity in the gene encoding the circumsporozoite protein (CSP) of Plasmodium falciparum from different transmission areas--XVI. Asembo Bay Cohort Project. Mol Biochem Parasitol125(1-2):83-90 (2002).
	8	AF540457.1	Asembo Bay	Escalante AA, Grebert HM, Isea R, Goldman IF, Basco L, Magris M, Biswas S, Kariuki S and Lal AA. A study of genetic diversity in the gene encoding the circumsporozoite protein (CSP) of Plasmodium falciparum from different transmission areas--XVI. Asembo Bay Cohort Project. Mol Biochem Parasitol125(1-2):83-90 (2002).
	9	AF540461.1	Asembo Bay	Escalante AA, Grebert HM, Isea R, Goldman IF, Basco L, Magris M, Biswas S, Kariuki S and Lal AA. A study of genetic diversity in the gene encoding the circumsporozoite protein (CSP) of Plasmodium falciparum from different transmission areas--XVI. Asembo Bay Cohort Project. Mol Biochem Parasitol125(1-2):83-90 (2002).
	10	AF540462.1	Asembo Bay	Escalante AA, Grebert HM, Isea R, Goldman IF, Basco L, Magris M, Biswas S, Kariuki S and Lal AA. A study of genetic diversity in the gene encoding the circumsporozoite protein (CSP) of Plasmodium falciparum from different transmission areas--XVI. Asembo Bay Cohort Project. Mol Biochem Parasitol125(1-2):83-90 (2002).
	11	AF540463.1	Asembo Bay	Escalante AA, Grebert HM, Isea R, Goldman IF, Basco L, Magris M, Biswas S, Kariuki S and Lal AA. A study of genetic diversity in the gene encoding the circumsporozoite protein (CSP) of Plasmodium falciparum from different transmission areas--XVI. Asembo Bay Cohort Project. Mol Biochem Parasitol125(1-2):83-90 (2002).
	12	AF540465.1	Asembo Bay	Escalante AA, Grebert HM, Isea R, Goldman IF, Basco L, Magris M, Biswas S, Kariuki S and Lal AA. A study of genetic diversity in the gene encoding the circumsporozoite protein (CSP) of Plasmodium falciparum from different transmission areas--XVI. Asembo Bay Cohort Project. Mol Biochem Parasitol125(1-2):83-90 (2002).
	13	AF540467.1	Asembo Bay	Escalante AA, Grebert HM, Isea R, Goldman IF, Basco L, Magris M, Biswas S, Kariuki S and Lal AA. A study of genetic diversity in the gene encoding the circumsporozoite protein (CSP) of Plasmodium falciparum from different transmission areas--XVI. Asembo Bay Cohort Project. Mol Biochem Parasitol125(1-2):83-90 (2002).
	14	AF540473.1	Asembo Bay	Escalante AA, Grebert HM, Isea R, Goldman IF, Basco L, Magris M, Biswas S, Kariuki S and Lal AA. A study of genetic diversity in the gene encoding the circumsporozoite protein (CSP) of Plasmodium falciparum from different transmission areas--XVI. Asembo Bay Cohort Project. Mol Biochem Parasitol125(1-2):83-90 (2002).
	15	AF540474.1	Asembo Bay	Escalante AA, Grebert HM, Isea R, Goldman IF, Basco L, Magris M, Biswas S, Kariuki S and Lal AA. A study of genetic diversity in the gene encoding the circumsporozoite protein (CSP) of Plasmodium falciparum from different transmission areas--XVI. Asembo Bay Cohort Project. Mol Biochem Parasitol125(1-2):83-90 (2002).
	16	AF540475.1	Asembo Bay	Escalante AA, Grebert HM, Isea R, Goldman IF, Basco L, Magris M, Biswas S, Kariuki S and Lal AA. A study of genetic diversity in the gene encoding the circumsporozoite protein (CSP) of Plasmodium falciparum from different transmission areas--XVI. Asembo Bay Cohort Project. Mol Biochem Parasitol125(1-2):83-90 (2002).
	17	AF540476.1	Asembo Bay	Escalante AA, Grebert HM, Isea R, Goldman IF, Basco L, Magris M, Biswas S, Kariuki S and Lal AA. A study of genetic diversity in the gene encoding the circumsporozoite protein (CSP) of Plasmodium falciparum from different transmission areas--XVI. Asembo Bay Cohort Project. Mol Biochem Parasitol125(1-2):83-90 (2002).
	18	AF540477.1	Asembo Bay	Escalante AA, Grebert HM, Isea R, Goldman IF, Basco L, Magris M, Biswas S, Kariuki S and Lal AA. A study of genetic diversity in the gene encoding the circumsporozoite protein (CSP) of Plasmodium falciparum from different transmission areas--XVI. Asembo Bay Cohort Project. Mol Biochem Parasitol125(1-2):83-90 (2002).
	1	AF181833.1	Gambia	Alloueche A, Silveira H, Conway DJ, Bojang K, Doherty T, Cohen J, Pinder M, Greenwood BM. High-throughput sequence typing of T-cell epitope polymorphisms in Plasmodium falciparum circumsporozoite protein. Mol Biochem Parasitol. 5;106(2):273-82 (2000).
	2	AF181834.1	Gambia	Alloueche A, Silveira H, Conway DJ, Bojang K, Doherty T, Cohen J, Pinder M, Greenwood BM. High-throughput sequence typing of T-cell epitope polymorphisms in Plasmodium falciparum circumsporozoite protein. Mol Biochem Parasitol. 5;106(2):273-82 (2000).
	3	AF181835.1	Gambia	Alloueche A, Silveira H, Conway DJ, Bojang K, Doherty T, Cohen J, Pinder M, Greenwood BM. High-throughput sequence typing of T-cell epitope polymorphisms in Plasmodium falciparum circumsporozoite protein. Mol Biochem Parasitol. 5;106(2):273-82 (2000).
	4	AY878598.1	Gambia	Weedall GD, Preston BM, Thomas AW, Sutherland CJ, Conway DJ. Differential evidence of natural selection on two leading sporozoite stage malaria vaccine candidate antigens. Int J Parasitol. 37(1):77-85 (2007)
	5	AY878599.1	Gambia	Weedall GD, Preston BM, Thomas AW, Sutherland CJ, Conway DJ. Differential evidence of natural selection on two leading sporozoite stage malaria vaccine candidate antigens. Int J Parasitol. 37(1):77-85 (2007)
	6	AY878600.1	Gambia	Weedall GD, Preston BM, Thomas AW, Sutherland CJ, Conway DJ. Differential evidence of natural selection on two leading sporozoite stage malaria vaccine candidate antigens. Int J Parasitol. 37(1):77-85 (2007)
	7	AY878601.1	Gambia	Weedall GD, Preston BM, Thomas AW, Sutherland CJ, Conway DJ. Differential evidence of natural selection on two leading sporozoite stage malaria vaccine candidate antigens. Int J Parasitol. 37(1):77-85 (2007)
	8	AY878602.1	Gambia	Weedall GD, Preston BM, Thomas AW, Sutherland CJ, Conway DJ. Differential evidence of natural selection on two leading sporozoite stage malaria vaccine candidate antigens. Int J Parasitol. 37(1):77-85 (2007)
	9	AY878603.1	Gambia	Weedall GD, Preston BM, Thomas AW, Sutherland CJ, Conway DJ. Differential evidence of natural selection on two leading sporozoite stage malaria vaccine candidate antigens. Int J Parasitol. 37(1):77-85 (2007)
	10	AY878604.1	Gambia	Weedall GD, Preston BM, Thomas AW, Sutherland CJ, Conway DJ. Differential evidence of natural selection on two leading sporozoite stage malaria vaccine candidate antigens. Int J Parasitol. 37(1):77-85 (2007)
	11	AY878605.1	Gambia	Weedall GD, Preston BM, Thomas AW, Sutherland CJ, Conway DJ. Differential evidence of natural selection on two leading sporozoite stage malaria vaccine candidate antigens. Int J Parasitol. 37(1):77-85 (2007)
	12	AY878606.1	Gambia	Weedall GD, Preston BM, Thomas AW, Sutherland CJ, Conway DJ. Differential evidence of natural selection on two leading sporozoite stage malaria vaccine candidate antigens. Int J Parasitol. 37(1):77-85 (2007)
	13	AY878607.1	Gambia	Weedall GD, Preston BM, Thomas AW, Sutherland CJ, Conway DJ. Differential evidence of natural selection on two leading sporozoite stage malaria vaccine candidate antigens. Int J Parasitol. 37(1):77-85 (2007)
	14	AY878608.1	Gambia	Weedall GD, Preston BM, Thomas AW, Sutherland CJ, Conway DJ. Differential evidence of natural selection on two leading sporozoite stage malaria vaccine candidate antigens. Int J Parasitol. 37(1):77-85 (2007)
	15	AY878609.1	Gambia	Weedall GD, Preston BM, Thomas AW, Sutherland CJ, Conway DJ. Differential evidence of natural selection on two leading sporozoite stage malaria vaccine candidate antigens. Int J Parasitol. 37(1):77-85 (2007)
	16	AY878610.1	Gambia	Weedall GD, Preston BM, Thomas AW, Sutherland CJ, Conway DJ. Differential evidence of natural selection on two leading sporozoite stage malaria vaccine candidate antigens. Int J Parasitol. 37(1):77-85 (2007)
	17	AY878611.1	Gambia	Weedall GD, Preston BM, Thomas AW, Sutherland CJ, Conway DJ. Differential evidence of natural selection on two leading sporozoite stage malaria vaccine candidate antigens. Int J Parasitol. 37(1):77-85 (2007)
	18	AY878612.1	Gambia	Weedall GD, Preston BM, Thomas AW, Sutherland CJ, Conway DJ. Differential evidence of natural selection on two leading sporozoite stage malaria vaccine candidate antigens. Int J Parasitol. 37(1):77-85 (2007)
	19	AY878613.1	Gambia	Weedall GD, Preston BM, Thomas AW, Sutherland CJ, Conway DJ. Differential evidence of natural selection on two leading sporozoite stage malaria vaccine candidate antigens. Int J Parasitol. 37(1):77-85 (2007)
	20	AY878614.1	Gambia	Weedall GD, Preston BM, Thomas AW, Sutherland CJ, Conway DJ. Differential evidence of natural selection on two leading sporozoite stage malaria vaccine candidate antigens. Int J Parasitol. 37(1):77-85 (2007)
	21	AY878615.1	Gambia	Weedall GD, Preston BM, Thomas AW, Sutherland CJ, Conway DJ. Differential evidence of natural selection on two leading sporozoite stage malaria vaccine candidate antigens. Int J Parasitol. 37(1):77-85 (2007)
	22	AY878616.1	Gambia	Weedall GD, Preston BM, Thomas AW, Sutherland CJ, Conway DJ. Differential evidence of natural selection on two leading sporozoite stage malaria vaccine candidate antigens. Int J Parasitol. 37(1):77-85 (2007)
	23	AY878617.1	Gambia	Weedall GD, Preston BM, Thomas AW, Sutherland CJ, Conway DJ. Differential evidence of natural selection on two leading sporozoite stage malaria vaccine candidate antigens. Int J Parasitol. 37(1):77-85 (2007)
	24	AY878618.1	Gambia	Weedall GD, Preston BM, Thomas AW, Sutherland CJ, Conway DJ. Differential evidence of natural selection on two leading sporozoite stage malaria vaccine candidate antigens. Int J Parasitol. 37(1):77-85 (2007)
	25	AY878619.1	Gambia	Weedall GD, Preston BM, Thomas AW, Sutherland CJ, Conway DJ. Differential evidence of natural selection on two leading sporozoite stage malaria vaccine candidate antigens. Int J Parasitol. 37(1):77-85 (2007)
	26	AY878620.1	Gambia	Weedall GD, Preston BM, Thomas AW, Sutherland CJ, Conway DJ. Differential evidence of natural selection on two leading sporozoite stage malaria vaccine candidate antigens. Int J Parasitol. 37(1):77-85 (2007)
	27	AY878621.1	Gambia	Weedall GD, Preston BM, Thomas AW, Sutherland CJ, Conway DJ. Differential evidence of natural selection on two leading sporozoite stage malaria vaccine candidate antigens. Int J Parasitol. 37(1):77-85 (2007)
	28	AY878622.1	Gambia	Weedall GD, Preston BM, Thomas AW, Sutherland CJ, Conway DJ. Differential evidence of natural selection on two leading sporozoite stage malaria vaccine candidate antigens. Int J Parasitol. 37(1):77-85 (2007)
	29	AY878623.1	Gambia	Weedall GD, Preston BM, Thomas AW, Sutherland CJ, Conway DJ. Differential evidence of natural selection on two leading sporozoite stage malaria vaccine candidate antigens. Int J Parasitol. 37(1):77-85 (2007)
	30	AY878624.1	Gambia	Weedall GD, Preston BM, Thomas AW, Sutherland CJ, Conway DJ. Differential evidence of natural selection on two leading sporozoite stage malaria vaccine candidate antigens. Int J Parasitol. 37(1):77-85 (2007)
	31	AY878625.1	Gambia	Weedall GD, Preston BM, Thomas AW, Sutherland CJ, Conway DJ. Differential evidence of natural selection on two leading sporozoite stage malaria vaccine candidate antigens. Int J Parasitol. 37(1):77-85 (2007)
	32	AY878626.1	Gambia	Weedall GD, Preston BM, Thomas AW, Sutherland CJ, Conway DJ. Differential evidence of natural selection on two leading sporozoite stage malaria vaccine candidate antigens. Int J Parasitol. 37(1):77-85 (2007)
	33	AY878627.1	Gambia	Weedall GD, Preston BM, Thomas AW, Sutherland CJ, Conway DJ. Differential evidence of natural selection on two leading sporozoite stage malaria vaccine candidate antigens. Int J Parasitol. 37(1):77-85 (2007)
	34	AY878628.1	Gambia	Weedall GD, Preston BM, Thomas AW, Sutherland CJ, Conway DJ. Differential evidence of natural selection on two leading sporozoite stage malaria vaccine candidate antigens. Int J Parasitol. 37(1):77-85 (2007)
	35	AY878629.1	Gambia	Weedall GD, Preston BM, Thomas AW, Sutherland CJ, Conway DJ. Differential evidence of natural selection on two leading sporozoite stage malaria vaccine candidate antigens. Int J Parasitol. 37(1):77-85 (2007)
	36	AY878630.1	Gambia	Weedall GD, Preston BM, Thomas AW, Sutherland CJ, Conway DJ. Differential evidence of natural selection on two leading sporozoite stage malaria vaccine candidate antigens. Int J Parasitol. 37(1):77-85 (2007)
	37	AY878631.1	Gambia	Weedall GD, Preston BM, Thomas AW, Sutherland CJ, Conway DJ. Differential evidence of natural selection on two leading sporozoite stage malaria vaccine candidate antigens. Int J Parasitol. 37(1):77-85 (2007)
	38	AY878632.1	Gambia	Weedall GD, Preston BM, Thomas AW, Sutherland CJ, Conway DJ. Differential evidence of natural selection on two leading sporozoite stage malaria vaccine candidate antigens. Int J Parasitol. 37(1):77-85 (2007)
	39	AY878633.1	Gambia	Weedall GD, Preston BM, Thomas AW, Sutherland CJ, Conway DJ. Differential evidence of natural selection on two leading sporozoite stage malaria vaccine candidate antigens. Int J Parasitol. 37(1):77-85 (2007)
	40	AY878634.1	Gambia	Weedall GD, Preston BM, Thomas AW, Sutherland CJ, Conway DJ. Differential evidence of natural selection on two leading sporozoite stage malaria vaccine candidate antigens. Int J Parasitol. 37(1):77-85 (2007)
	41	AY878635.1	Gambia	Weedall GD, Preston BM, Thomas AW, Sutherland CJ, Conway DJ. Differential evidence of natural selection on two leading sporozoite stage malaria vaccine candidate antigens. Int J Parasitol. 37(1):77-85 (2007)
	42	AY878636.1	Gambia	Weedall GD, Preston BM, Thomas AW, Sutherland CJ, Conway DJ. Differential evidence of natural selection on two leading sporozoite stage malaria vaccine candidate antigens. Int J Parasitol. 37(1):77-85 (2007)
	43	AY878637.1	Gambia	Weedall GD, Preston BM, Thomas AW, Sutherland CJ, Conway DJ. Differential evidence of natural selection on two leading sporozoite stage malaria vaccine candidate antigens. Int J Parasitol. 37(1):77-85 (2007)
	44	AY878638.1	Gambia	Weedall GD, Preston BM, Thomas AW, Sutherland CJ, Conway DJ. Differential evidence of natural selection on two leading sporozoite stage malaria vaccine candidate antigens. Int J Parasitol. 37(1):77-85 (2007)
	45	AY878639.1	Gambia	Weedall GD, Preston BM, Thomas AW, Sutherland CJ, Conway DJ. Differential evidence of natural selection on two leading sporozoite stage malaria vaccine candidate antigens. Int J Parasitol. 37(1):77-85 (2007)
	46	AY878640.1	Gambia	Weedall GD, Preston BM, Thomas AW, Sutherland CJ, Conway DJ. Differential evidence of natural selection on two leading sporozoite stage malaria vaccine candidate antigens. Int J Parasitol. 37(1):77-85 (2007)
	47	AY878641.1	Gambia	Weedall GD, Preston BM, Thomas AW, Sutherland CJ, Conway DJ. Differential evidence of natural selection on two leading sporozoite stage malaria vaccine candidate antigens. Int J Parasitol. 37(1):77-85 (2007)
	1	AJ269948.1	Senegal	de Stricker,K., Vuust,J., Jepsen,S., Oeuvray,C. and Theisen,M. Sequence variation in the non-repeat region of the Plasmodium falciparum glutamate rich protein (GLURP) from Brazil, Senegalese and Burmese field isolates and from laboratory strains. (Unpublished)
	2	AJ269961.1	Senegal	de Stricker,K., Vuust,J., Jepsen,S., Oeuvray,C. and Theisen,M. Sequence variation in the non-repeat region of the Plasmodium falciparum glutamate rich protein (GLURP) from Brazil, Senegalese and Burmese field isolates and from laboratory strains. (Unpublished)
	3	AJ269962.1	Senegal	de Stricker,K., Vuust,J., Jepsen,S., Oeuvray,C. and Theisen,M. Sequence variation in the non-repeat region of the Plasmodium falciparum glutamate rich protein (GLURP) from Brazil, Senegalese and Burmese field isolates and from laboratory strains. (Unpublished)
	4	AJ269963.1	Senegal	de Stricker,K., Vuust,J., Jepsen,S., Oeuvray,C. and Theisen,M. Sequence variation in the non-repeat region of the Plasmodium falciparum glutamate rich protein (GLURP) from Brazil, Senegalese and Burmese field isolates and from laboratory strains. (Unpublished)
	5	AJ269964.1	Senegal	de Stricker,K., Vuust,J., Jepsen,S., Oeuvray,C. and Theisen,M. Sequence variation in the non-repeat region of the Plasmodium falciparum glutamate rich protein (GLURP) from Brazil, Senegalese and Burmese field isolates and from laboratory strains. (Unpublished)
	6	AJ269965.1	Senegal	de Stricker,K., Vuust,J., Jepsen,S., Oeuvray,C. and Theisen,M. Sequence variation in the non-repeat region of the Plasmodium falciparum glutamate rich protein (GLURP) from Brazil, Senegalese and Burmese field isolates and from laboratory strains. (Unpublished)
	7	AJ269966.1	Senegal	de Stricker,K., Vuust,J., Jepsen,S., Oeuvray,C. and Theisen,M. Sequence variation in the non-repeat region of the Plasmodium falciparum glutamate rich protein (GLURP) from Brazil, Senegalese and Burmese field isolates and from laboratory strains. (Unpublished)
	8	AJ269967.1	Senegal	de Stricker,K., Vuust,J., Jepsen,S., Oeuvray,C. and Theisen,M. Sequence variation in the non-repeat region of the Plasmodium falciparum glutamate rich protein (GLURP) from Brazil, Senegalese and Burmese field isolates and from laboratory strains. (Unpublished)
	9	AJ269968.1	Senegal	de Stricker,K., Vuust,J., Jepsen,S., Oeuvray,C. and Theisen,M. Sequence variation in the non-repeat region of the Plasmodium falciparum glutamate rich protein (GLURP) from Brazil, Senegalese and Burmese field isolates and from laboratory strains. (Unpublished)
	10	AJ269969.1	Senegal	de Stricker,K., Vuust,J., Jepsen,S., Oeuvray,C. and Theisen,M. Sequence variation in the non-repeat region of the Plasmodium falciparum glutamate rich protein (GLURP) from Brazil, Senegalese and Burmese field isolates and from laboratory strains. (Unpublished)
	11	AJ269970.1	Senegal	de Stricker,K., Vuust,J., Jepsen,S., Oeuvray,C. and Theisen,M. Sequence variation in the non-repeat region of the Plasmodium falciparum glutamate rich protein (GLURP) from Brazil, Senegalese and Burmese field isolates and from laboratory strains. (Unpublished)
	1	GQ119637.1	Sierra Leone	Jalloh A, Jalloh M, Matsuoka H. T-cell epitope polymorphisms of the Plasmodium falciparum circumsporozoite protein among field isolates from Sierra Leone: age-dependent haplotype distribution. Malar J. 5;8:120. (2009)
	2	GQ119638.1	Sierra Leone	Jalloh A, Jalloh M, Matsuoka H. T-cell epitope polymorphisms of the Plasmodium falciparum circumsporozoite protein among field isolates from Sierra Leone: age-dependent haplotype distribution. Malar J. 5;8:120. (2009)
	3	GQ119639.1	Sierra Leone	Jalloh A, Jalloh M, Matsuoka H. T-cell epitope polymorphisms of the Plasmodium falciparum circumsporozoite protein among field isolates from Sierra Leone: age-dependent haplotype distribution. Malar J. 5;8:120. (2009)
	4	GQ119640.1	Sierra Leone	Jalloh A, Jalloh M, Matsuoka H. T-cell epitope polymorphisms of the Plasmodium falciparum circumsporozoite protein among field isolates from Sierra Leone: age-dependent haplotype distribution. Malar J. 5;8:120. (2009)
	5	GQ119641.1	Sierra Leone	Jalloh A, Jalloh M, Matsuoka H. T-cell epitope polymorphisms of the Plasmodium falciparum circumsporozoite protein among field isolates from Sierra Leone: age-dependent haplotype distribution. Malar J. 5;8:120. (2009)
	6	GQ119642.1	Sierra Leone	Jalloh A, Jalloh M, Matsuoka H. T-cell epitope polymorphisms of the Plasmodium falciparum circumsporozoite protein among field isolates from Sierra Leone: age-dependent haplotype distribution. Malar J. 5;8:120. (2009)
	7	GQ119643.1	Sierra Leone	Jalloh A, Jalloh M, Matsuoka H. T-cell epitope polymorphisms of the Plasmodium falciparum circumsporozoite protein among field isolates from Sierra Leone: age-dependent haplotype distribution. Malar J. 5;8:120. (2009)
	8	GQ119644.1	Sierra Leone	Jalloh A, Jalloh M, Matsuoka H. T-cell epitope polymorphisms of the Plasmodium falciparum circumsporozoite protein among field isolates from Sierra Leone: age-dependent haplotype distribution. Malar J. 5;8:120. (2009)
	9	GQ119645.1	Sierra Leone	Jalloh A, Jalloh M, Matsuoka H. T-cell epitope polymorphisms of the Plasmodium falciparum circumsporozoite protein among field isolates from Sierra Leone: age-dependent haplotype distribution. Malar J. 5;8:120. (2009)
	10	GQ119646.1	Sierra Leone	Jalloh A, Jalloh M, Matsuoka H. T-cell epitope polymorphisms of the Plasmodium falciparum circumsporozoite protein among field isolates from Sierra Leone: age-dependent haplotype distribution. Malar J. 5;8:120. (2009)
	11	GQ119647.1	Sierra Leone	Jalloh A, Jalloh M, Matsuoka H. T-cell epitope polymorphisms of the Plasmodium falciparum circumsporozoite protein among field isolates from Sierra Leone: age-dependent haplotype distribution. Malar J. 5;8:120. (2009)
	12	GQ119648.1	Sierra Leone	Jalloh A, Jalloh M, Matsuoka H. T-cell epitope polymorphisms of the Plasmodium falciparum circumsporozoite protein among field isolates from Sierra Leone: age-dependent haplotype distribution. Malar J. 5;8:120. (2009)
	13	GQ119649.1	Sierra Leone	Jalloh A, Jalloh M, Matsuoka H. T-cell epitope polymorphisms of the Plasmodium falciparum circumsporozoite protein among field isolates from Sierra Leone: age-dependent haplotype distribution. Malar J. 5;8:120. (2009)
	14	GQ119650.1	Sierra Leone	Jalloh A, Jalloh M, Matsuoka H. T-cell epitope polymorphisms of the Plasmodium falciparum circumsporozoite protein among field isolates from Sierra Leone: age-dependent haplotype distribution. Malar J. 5;8:120. (2009)
	15	GQ119651.1	Sierra Leone	Jalloh A, Jalloh M, Matsuoka H. T-cell epitope polymorphisms of the Plasmodium falciparum circumsporozoite protein among field isolates from Sierra Leone: age-dependent haplotype distribution. Malar J. 5;8:120. (2009)
	16	GQ119652.1	Sierra Leone	Jalloh A, Jalloh M, Matsuoka H. T-cell epitope polymorphisms of the Plasmodium falciparum circumsporozoite protein among field isolates from Sierra Leone: age-dependent haplotype distribution. Malar J. 5;8:120. (2009)
	17	GQ119653.1	Sierra Leone	Jalloh A, Jalloh M, Matsuoka H. T-cell epitope polymorphisms of the Plasmodium falciparum circumsporozoite protein among field isolates from Sierra Leone: age-dependent haplotype distribution. Malar J. 5;8:120. (2009)
	18	GQ119654.1	Sierra Leone	Jalloh A, Jalloh M, Matsuoka H. T-cell epitope polymorphisms of the Plasmodium falciparum circumsporozoite protein among field isolates from Sierra Leone: age-dependent haplotype distribution. Malar J. 5;8:120. (2009)
	19	GQ119655.1	Sierra Leone	Jalloh A, Jalloh M, Matsuoka H. T-cell epitope polymorphisms of the Plasmodium falciparum circumsporozoite protein among field isolates from Sierra Leone: age-dependent haplotype distribution. Malar J. 5;8:120. (2009)
	20	GQ119656.1	Sierra Leone	Jalloh A, Jalloh M, Matsuoka H. T-cell epitope polymorphisms of the Plasmodium falciparum circumsporozoite protein among field isolates from Sierra Leone: age-dependent haplotype distribution. Malar J. 5;8:120. (2009)
	21	GQ119657.1	Sierra Leone	Jalloh A, Jalloh M, Matsuoka H. T-cell epitope polymorphisms of the Plasmodium falciparum circumsporozoite protein among field isolates from Sierra Leone: age-dependent haplotype distribution. Malar J. 5;8:120. (2009)
	22	GQ119658.1	Sierra Leone	Jalloh A, Jalloh M, Matsuoka H. T-cell epitope polymorphisms of the Plasmodium falciparum circumsporozoite protein among field isolates from Sierra Leone: age-dependent haplotype distribution. Malar J. 5;8:120. (2009)
	23	GQ119659.1	Sierra Leone	Jalloh A, Jalloh M, Matsuoka H. T-cell epitope polymorphisms of the Plasmodium falciparum circumsporozoite protein among field isolates from Sierra Leone: age-dependent haplotype distribution. Malar J. 5;8:120. (2009)
	24	GQ119660.1	Sierra Leone	Jalloh A, Jalloh M, Matsuoka H. T-cell epitope polymorphisms of the Plasmodium falciparum circumsporozoite protein among field isolates from Sierra Leone: age-dependent haplotype distribution. Malar J. 5;8:120. (2009)
	25	GQ119661.1	Sierra Leone	Jalloh A, Jalloh M, Matsuoka H. T-cell epitope polymorphisms of the Plasmodium falciparum circumsporozoite protein among field isolates from Sierra Leone: age-dependent haplotype distribution. Malar J. 5;8:120. (2009)
	26	GQ119662.1	Sierra Leone	Jalloh A, Jalloh M, Matsuoka H. T-cell epitope polymorphisms of the Plasmodium falciparum circumsporozoite protein among field isolates from Sierra Leone: age-dependent haplotype distribution. Malar J. 5;8:120. (2009)
	27	GQ119663.1	Sierra Leone	Jalloh A, Jalloh M, Matsuoka H. T-cell epitope polymorphisms of the Plasmodium falciparum circumsporozoite protein among field isolates from Sierra Leone: age-dependent haplotype distribution. Malar J. 5;8:120. (2009)
	28	GQ119664.1	Sierra Leone	Jalloh A, Jalloh M, Matsuoka H. T-cell epitope polymorphisms of the Plasmodium falciparum circumsporozoite protein among field isolates from Sierra Leone: age-dependent haplotype distribution. Malar J. 5;8:120. (2009)
	29	GQ119665.1	Sierra Leone	Jalloh A, Jalloh M, Matsuoka H. T-cell epitope polymorphisms of the Plasmodium falciparum circumsporozoite protein among field isolates from Sierra Leone: age-dependent haplotype distribution. Malar J. 5;8:120. (2009)
	30	GQ119666.1	Sierra Leone	Jalloh A, Jalloh M, Matsuoka H. T-cell epitope polymorphisms of the Plasmodium falciparum circumsporozoite protein among field isolates from Sierra Leone: age-dependent haplotype distribution. Malar J. 5;8:120. (2009)
	31	GQ119667.1	Sierra Leone	Jalloh A, Jalloh M, Matsuoka H. T-cell epitope polymorphisms of the Plasmodium falciparum circumsporozoite protein among field isolates from Sierra Leone: age-dependent haplotype distribution. Malar J. 5;8:120. (2009)
	32	GQ119668.1	Sierra Leone	Jalloh A, Jalloh M, Matsuoka H. T-cell epitope polymorphisms of the Plasmodium falciparum circumsporozoite protein among field isolates from Sierra Leone: age-dependent haplotype distribution. Malar J. 5;8:120. (2009)
	33	GQ119669.1	Sierra Leone	Jalloh A, Jalloh M, Matsuoka H. T-cell epitope polymorphisms of the Plasmodium falciparum circumsporozoite protein among field isolates from Sierra Leone: age-dependent haplotype distribution. Malar J. 5;8:120. (2009)
	34	GQ119670.1	Sierra Leone	Jalloh A, Jalloh M, Matsuoka H. T-cell epitope polymorphisms of the Plasmodium falciparum circumsporozoite protein among field isolates from Sierra Leone: age-dependent haplotype distribution. Malar J. 5;8:120. (2009)
	35	GQ119671.1	Sierra Leone	Jalloh A, Jalloh M, Matsuoka H. T-cell epitope polymorphisms of the Plasmodium falciparum circumsporozoite protein among field isolates from Sierra Leone: age-dependent haplotype distribution. Malar J. 5;8:120. (2009)
	36	GQ119672.1	Sierra Leone	Jalloh A, Jalloh M, Matsuoka H. T-cell epitope polymorphisms of the Plasmodium falciparum circumsporozoite protein among field isolates from Sierra Leone: age-dependent haplotype distribution. Malar J. 5;8:120. (2009)
	37	GQ119673.1	Sierra Leone	Jalloh A, Jalloh M, Matsuoka H. T-cell epitope polymorphisms of the Plasmodium falciparum circumsporozoite protein among field isolates from Sierra Leone: age-dependent haplotype distribution. Malar J. 5;8:120. (2009)
	38	GQ119674.1	Sierra Leone	Jalloh A, Jalloh M, Matsuoka H. T-cell epitope polymorphisms of the Plasmodium falciparum circumsporozoite protein among field isolates from Sierra Leone: age-dependent haplotype distribution. Malar J. 5;8:120. (2009)
	39	GQ119675.1	Sierra Leone	Jalloh A, Jalloh M, Matsuoka H. T-cell epitope polymorphisms of the Plasmodium falciparum circumsporozoite protein among field isolates from Sierra Leone: age-dependent haplotype distribution. Malar J. 5;8:120. (2009)
	40	GQ119676.1	Sierra Leone	Jalloh A, Jalloh M, Matsuoka H. T-cell epitope polymorphisms of the Plasmodium falciparum circumsporozoite protein among field isolates from Sierra Leone: age-dependent haplotype distribution. Malar J. 5;8:120. (2009)
	41	GQ119677.1	Sierra Leone	Jalloh A, Jalloh M, Matsuoka H. T-cell epitope polymorphisms of the Plasmodium falciparum circumsporozoite protein among field isolates from Sierra Leone: age-dependent haplotype distribution. Malar J. 5;8:120. (2009)
	42	GQ119678.1	Sierra Leone	Jalloh A, Jalloh M, Matsuoka H. T-cell epitope polymorphisms of the Plasmodium falciparum circumsporozoite protein among field isolates from Sierra Leone: age-dependent haplotype distribution. Malar J. 5;8:120. (2009)
	1	AF540444.1	Cameroon	Escalante AA, Grebert HM, Isea R, Goldman IF, Basco L, Magris M, Biswas S, Kariuki S and Lal AA. A study of genetic diversity in the gene encoding the circumsporozoite protein (CSP) of Plasmodium falciparum from different transmission areas--XVI. Asembo Bay Cohort Project. Mol Biochem Parasitol125(1-2):83-90 (2002).
	2	AF540445.1	Cameroon	Escalante AA, Grebert HM, Isea R, Goldman IF, Basco L, Magris M, Biswas S, Kariuki S and Lal AA. A study of genetic diversity in the gene encoding the circumsporozoite protein (CSP) of Plasmodium falciparum from different transmission areas--XVI. Asembo Bay Cohort Project. Mol Biochem Parasitol125(1-2):83-90 (2002).
	3	AF540446.1	Cameroon	Escalante AA, Grebert HM, Isea R, Goldman IF, Basco L, Magris M, Biswas S, Kariuki S and Lal AA. A study of genetic diversity in the gene encoding the circumsporozoite protein (CSP) of Plasmodium falciparum from different transmission areas--XVI. Asembo Bay Cohort Project. Mol Biochem Parasitol125(1-2):83-90 (2002).
	4	AF540449.1	Cameroon	Escalante AA, Grebert HM, Isea R, Goldman IF, Basco L, Magris M, Biswas S, Kariuki S and Lal AA. A study of genetic diversity in the gene encoding the circumsporozoite protein (CSP) of Plasmodium falciparum from different transmission areas--XVI. Asembo Bay Cohort Project. Mol Biochem Parasitol125(1-2):83-90 (2002).
	5	AF540452.1	Cameroon	Escalante AA, Grebert HM, Isea R, Goldman IF, Basco L, Magris M, Biswas S, Kariuki S and Lal AA. A study of genetic diversity in the gene encoding the circumsporozoite protein (CSP) of Plasmodium falciparum from different transmission areas--XVI. Asembo Bay Cohort Project. Mol Biochem Parasitol125(1-2):83-90 (2002).
	6	AF540453.1	Cameroon	Escalante AA, Grebert HM, Isea R, Goldman IF, Basco L, Magris M, Biswas S, Kariuki S and Lal AA. A study of genetic diversity in the gene encoding the circumsporozoite protein (CSP) of Plasmodium falciparum from different transmission areas--XVI. Asembo Bay Cohort Project. Mol Biochem Parasitol125(1-2):83-90 (2002).
	7	AF540454.1	Cameroon	Escalante AA, Grebert HM, Isea R, Goldman IF, Basco L, Magris M, Biswas S, Kariuki S and Lal AA. A study of genetic diversity in the gene encoding the circumsporozoite protein (CSP) of Plasmodium falciparum from different transmission areas--XVI. Asembo Bay Cohort Project. Mol Biochem Parasitol125(1-2):83-90 (2002).
	8	AF540468.1	Cameroon	Escalante AA, Grebert HM, Isea R, Goldman IF, Basco L, Magris M, Biswas S, Kariuki S and Lal AA. A study of genetic diversity in the gene encoding the circumsporozoite protein (CSP) of Plasmodium falciparum from different transmission areas--XVI. Asembo Bay Cohort Project. Mol Biochem Parasitol125(1-2):83-90 (2002).
	9	AF540480.1	Cameroon	Escalante AA, Grebert HM, Isea R, Goldman IF, Basco L, Magris M, Biswas S, Kariuki S and Lal AA. A study of genetic diversity in the gene encoding the circumsporozoite protein (CSP) of Plasmodium falciparum from different transmission areas--XVI. Asembo Bay Cohort Project. Mol Biochem Parasitol125(1-2):83-90 (2002).
