# Supplementary material for: Genetic Variation in the Plasmodium falciparum Circumsporozoite Protein in India and Its Relevance to RTS,S Malaria Vaccine
Source: PLoS One. 2012 Aug 17;7(8):e43430. doi: 10.1371/journal.pone.0043430 (PMC3422267; doi:10.1371/journal.pone.0043430)
Supplement: Table S3 — The CSP haplotypes (based on Th2R/Th3R regions) in P. falciparum isolates from Asia, South America and Africa. (XLS) [file pone.0043430.s006.xls]

## Sheet: Table-S1
	Haplotypes	Asia									South America			Africa
		JP	IN	IR	MM	TH	VN	IS	VT	PNG	VZ	BR	PR	KN	GB	SN	SL	CR	Total
	H1 (Dd2)	109	8	51	15	172	75	31	110										571
	H2	21																	21
	H3	1		15															16
	H4	2													7	1		1	11
	H5	2													5	2			9
	H6	4				3	15												22
	H7	6				2	1												9
	H8	1					5												6
	H9	5																	5
	H10	5																	5
	H11	2													1		1		4
	H12	4																	4
	H13	3																	3
	H14	1															1		2
	H15	2																	2
	H16	2																	2
	H17	2																	2
	H18	1																	1
	H19	1																	1
	H20	1																	1
	H21	1																	1
	H22	1																	1
	H23	1																	1
	H24	1																	1
	H25		2		1	19													22
	H26		1																1
	H27		1																1
	H28				3	109	7												119
	H29					2	15	1											18
	H30				1	21	2												24
	H31						5	2											7
	H32					3													3
	H33						3												3
	H34						3												3
	H35			2															2
	H36						2												2
	H37			1															1
	H38				1														1
	H39					1													1
	H40					1													1
	H41					1													1
	H42						1												1
	H43						1												1
	H44						1												1
	H45						1												1
	H46						1												1
	H47						1												1
	H48						1												1
	H49						1												1
	H50						1												1
	H51 (MAD20)					2		1	26	22									51
	H52 (7G8)			21								27	93		1		3		145
	H53 (HB3)							1					42						43
	H54										3	5							8
	H55										1		3						4
	H56										1								1
	H57										1								1
	H58										1								1
	H59											1							1
	H60 (3D7)														3	1	20		24
	H61																17		17
	H62														2	2	10		14
	H63													1	3		1	2	7
	H64													5	2				7
	H65														2		4	1	7
	H66														2		2	2	6
	H67										2			1	2				5
	H68													1	2		1	1	5
	H69																3	1	4
	H70														2		1		3
	H71														2		1		3
	H72																3		3
	H73																3		3
	H74													1	1				2
	H75													2					2
	H76														2				2
	H77																2		2
	H78																2		2
	H79																2		2
	H80										1			1					2
	H81														2				2
	H82													1	1				2
	H83																1	1	2
	H84													1		1			2
	H85														1		1		2
	H86													1					1
	H87													1					1
	H88													1					1
	H89													1					1
	H90														1				1
	H91														1				1
	H92														1				1
	H93														1				1
	H94															1			1
	H95															1			1
	H96															1			1
	H97															1			1
	H98																1		1
	H99																1		1
	H100																1		1
	H101																1		1
	H102																1		1
	H103																1		1
	H104																1		1
	H105																1		1
	H106																1		1
	H107																1		1
	H108																1		1
	H109																1		1
	H110																1		1
	H111																1		1
	H112																1		1
	H113																1		1
	H114																1		1
	H115																1		1
	H116																1		1
	H117																1		1
		179	12	90	21	336	142	36	136	22	10	33	138	18	47	11	99	9	1339
